# Supplementary material for: Multi-omic signatures identify pan-cancer classes of tumors beyond tissue of origin
Source: PubMed Central journal article supplement (PMC7239905; doi:10.1038/s41598-020-65119-5), 2020-05-20
Supplement: 41598_2020_65119_MOESM1_ESM.pdf [file 41598_2020_65119_MOESM1_ESM.pdf]

## Multi-omic signatures identify pan-cancer classes of tumors beyond tissue of origin.

Agustin Gonzalez-Reymundez<sup>1</sup>, Ana I. Vazquez<sup>1\*</sup>.

<sup>1</sup>Department of Epidemiology and Biostatistics, Michigan State University, MI, USA.

<sup>1</sup>Institute for Quantitative Health Science and Engineering (IQ), Michigan State University, MI, USA.

\*avazquez@msu.edu

**Table S1: Complete list of genes significantly de-regulated in at least one pan-cancer cluster.** All the genes significantly different in at least one cluster are sorted by chromosome (**Chr**) and genomic position (in base pairs). Significant differences between clusters are the results of Tukey tests on the enrichment scores for each gene (computed as the linear combination of omic features mapping onto the gene, and their corresponding loadings). Different letters represented with different letters according to . Genes highlighted with red represent known cancer-related genes.

| Gene             | Enrichment scores by cluster |                 |                 |                 |                  |                 |                  |                  | Chr | Start     | End       | GE    | METH  | CNV   | p_value  |
|------------------|------------------------------|-----------------|-----------------|-----------------|------------------|-----------------|------------------|------------------|-----|-----------|-----------|-------|-------|-------|----------|
|                  | C1                           | C2              | C3              | C4              | C5               | C6              | C7               | C8               |     |           |           |       |       |       |          |
| <i>C1orf159</i>  | 0.02<br>b                    | 0.10<br>ab      | -<br>b          | 0.15<br>ab      | 0.21<br>ab       | 0.41<br>a       | 0.00<br>b        | 0.09<br>b        | 1   | 1081818   | 1116361   | NA    | -0.04 | NA    | 6.36E-13 |
| <i>WASH2P</i>    | -<br>0.29<br>b               | -<br>0.21<br>a  | -<br>0.00<br>b  | -<br>0.05<br>ab | -<br>0.17<br>ab  | -<br>0.16<br>b  | -<br>0.04<br>b   | -<br>0.05<br>ab  | 2   | 113588550 | 113599043 | 0.00  | NA    | NA    | 9.78E-14 |
| <i>RAB6C</i>     | 0.08<br>ab                   | 0.04<br>bc      | 0.01<br>b       | 0.09<br>bc      | 0.42<br>bc       | 0.43<br>a       | 0.12<br>bc       | 0.48<br>c        | 2   | 129979664 | 129982738 | 0.03  | NA    | NA    | 4.47E-17 |
| <i>ITM2C</i>     | 0.07<br>ab                   | 0.01<br>b       | 0.06<br>b       | 0.15<br>ab      | 0.02<br>ab       | 0.41<br>a       | 0.07<br>ab       | 0.07<br>b        | 2   | 230864639 | 230879248 | -0.02 | NA    | NA    | 4.94E-11 |
| <i>HSP90AB2P</i> | -<br>0.19<br>ab              | -<br>0.02<br>ab | -<br>0.05<br>ab | -<br>0.28<br>a  | -<br>0.12<br>ab  | -<br>0.03<br>ab | -<br>0.51<br>b   | -<br>0.16<br>ab  | 4   | 13333414  | 13338657  | -0.03 | NA    | NA    | 2.62E-15 |
| <i>MCC</i>       | -<br>0.11<br>c               | -<br>0.03<br>bc | -<br>0.08<br>c  | -<br>0.42<br>ab | -<br>0.22<br>abc | -<br>0.60<br>a  | -<br>0.26<br>abc | -<br>0.29<br>abc | 5   | 113022099 | 113488830 | NA    | -0.03 | NA    | 1.35E-33 |
| <i>STK38</i>     | -<br>0.23<br>ab              | -<br>0.14<br>ab | -<br>0.09<br>a  | -<br>0.26<br>ab | -<br>0.14<br>ab  | -<br>0.12<br>a  | -<br>0.38<br>b   | -<br>0.01<br>ab  | 6   | 36493892  | 36547470  | 0.05  | NA    | -0.01 | 1.92E-18 |
| <i>PP1L1</i>     | -<br>0.11<br>ab              | -<br>0.10<br>ab | -<br>0.09<br>a  | -<br>0.23<br>ab | -<br>0.27<br>ab  | -<br>0.04<br>ab | -<br>0.44<br>b   | -<br>0.12<br>ab  | 6   | 36854827  | 36875024  | 0.02  | NA    | -0.01 | 3.22E-15 |
| <i>C6orf89</i>   | -<br>0.07<br>ab              | -<br>0.10<br>a  | -<br>0.03<br>ab | -<br>0.05<br>ab | -<br>0.19<br>a   | -<br>0.05<br>ab | -<br>0.33<br>ab  | -<br>0.14<br>a   | 6   | 36871870  | 36928964  | 0.05  | NA    | -0.01 | 5.86E-06 |
| <i>MTCH1</i>     | -<br>0.09<br>ab              | -<br>0.08<br>a  | -<br>0.00<br>ab | -<br>0.12<br>a  | -<br>0.06<br>ab  | -<br>0.11<br>a  | -<br>0.45<br>b   | -<br>0.08<br>ab  | 6   | 36968141  | 36986298  | -0.08 | NA    | -0.01 | 5.02E-09 |
| <i>TBC1D22B</i>  | -<br>0.03<br>a               | -<br>0.06<br>a  | -<br>0.03<br>a  | -<br>0.05<br>ab | -<br>0.15<br>ab  | -<br>0.03<br>a  | -<br>0.50<br>b   | -<br>0.07<br>a   | 6   | 37257772  | 37332970  | 0.04  | NA    | -0.01 | 2.49E-09 |
| <i>RNF8</i>      | -<br>0.15<br>ab              | -<br>0.00<br>a  | -<br>0.05<br>a  | -<br>0.19<br>ab | -<br>0.14<br>ab  | -<br>0.13<br>a  | -<br>0.46<br>b   | -<br>0.01<br>ab  | 6   | 37353972  | 37394738  | 0.04  | NA    | -0.01 | 1.05E-11 |

|                 |                 |                 |                 |                 |                 |                 |                 |                 |   |          |          |       |       |       |           |
|-----------------|-----------------|-----------------|-----------------|-----------------|-----------------|-----------------|-----------------|-----------------|---|----------|----------|-------|-------|-------|-----------|
| <i>CMTR1</i>    | -<br>0.03<br>ab | -<br>0.02<br>a  | -<br>0.05<br>a  | -<br>0.04<br>ab | -<br>0.10<br>ab | -<br>0.06<br>ab | -<br>0.46<br>b  | -<br>0.02<br>ab | 6 | 37433219 | 37482827 | 0.04  | NA    | -0.01 | 1.40E-08  |
| <i>ZFAND3</i>   | -<br>0.04<br>ab | -<br>0.06<br>a  | -<br>0.02<br>ab | -<br>0.05<br>ab | -<br>0.14<br>a  | -<br>0.09<br>ab | -<br>0.43<br>ab | -<br>0.03<br>ab | 6 | 37819499 | 38154624 | -0.02 | NA    | -0.01 | 1.92E-07  |
| <i>BTBD9</i>    | -<br>0.03<br>a  | -<br>0.13<br>a  | -<br>0.03<br>a  | -<br>0.29<br>a  | -<br>0.10<br>a  | -<br>0.05<br>a  | -<br>1.19<br>b  | -<br>0.03<br>a  | 6 | 38168451 | 38640148 | 0.04  | -0.01 | -0.02 | 1.04E-61  |
| <i>GLO1</i>     | -<br>0.21<br>ab | -<br>0.07<br>a  | -<br>0.05<br>a  | -<br>0.00<br>ab | -<br>0.02<br>ab | -<br>0.08<br>ab | -<br>0.50<br>b  | -<br>0.09<br>ab | 6 | 38675925 | 38703141 | 0.04  | NA    | -0.02 | 1.67E-14  |
| <i>SAYS1</i>    | -<br>0.17<br>ab | -<br>0.01<br>a  | -<br>0.04<br>a  | -<br>0.17<br>a  | -<br>0.21<br>a  | -<br>0.02<br>a  | -<br>0.48<br>ab | -<br>0.18<br>a  | 6 | 39104064 | 39115189 | 0.00  | NA    | -0.02 | 1.60E-12  |
| <i>LRFN2</i>    | -<br>0.02<br>b  | -<br>0.12<br>ab | -<br>0.05<br>b  | -<br>0.49<br>a  | -<br>0.14<br>b  | -<br>0.05<br>b  | -<br>1.60<br>c  | -<br>0.05<br>b  | 6 | 40391586 | 40587465 | NA    | 0.05  | -0.03 | 1.10E-118 |
| <i>UNC5CL</i>   | -<br>0.02<br>ab | -<br>0.05<br>ab | -<br>0.01<br>ab | -<br>0.00<br>ab | -<br>0.02<br>ab | -<br>0.18<br>a  | -<br>0.36<br>b  | -<br>0.10<br>ab | 6 | 41026911 | 41039217 | -0.03 | NA    | -0.03 | 5.13E-06  |
| <i>OARD1</i>    | -<br>0.18<br>a  | -<br>0.13<br>a  | -<br>0.03<br>a  | -<br>0.19<br>a  | -<br>0.21<br>a  | -<br>0.17<br>a  | -<br>0.87<br>b  | -<br>0.01<br>a  | 6 | 41033627 | 41097787 | 0.06  | NA    | -0.03 | 1.16E-37  |
| <i>NFYA</i>     | -<br>0.09<br>a  | -<br>0.09<br>a  | -<br>0.04<br>a  | -<br>0.06<br>a  | -<br>0.14<br>ab | -<br>0.04<br>a  | -<br>0.77<br>b  | -<br>0.05<br>a  | 6 | 41072945 | 41099976 | 0.02  | NA    | -0.03 | 4.39E-25  |
| <i>FOXP4</i>    | -<br>0.02<br>a  | -<br>0.07<br>a  | -<br>0.01<br>a  | -<br>0.27<br>a  | -<br>0.27<br>a  | -<br>0.04<br>a  | -<br>0.67<br>b  | -<br>0.10<br>a  | 6 | 41546426 | 41602384 | 0.04  | NA    | -0.03 | 1.26E-19  |
| <i>TFEB</i>     | -<br>0.16<br>ab | -<br>0.09<br>ab | -<br>0.07<br>ab | -<br>0.34<br>a  | -<br>0.31<br>ab | -<br>0.31<br>ab | -<br>0.31<br>b  | -<br>0.15<br>ab | 6 | 41683978 | 41736259 | -0.09 | NA    | -0.03 | 2.71E-18  |
| <i>FRS3</i>     | -<br>0.01<br>b  | -<br>0.16<br>b  | -<br>0.05<br>b  | -<br>0.76<br>a  | -<br>0.02<br>b  | -<br>0.06<br>b  | -<br>2.04<br>c  | -<br>0.13<br>b  | 6 | 41770176 | 41786542 | -0.05 | 0.12  | -0.04 | 9.81E-207 |
| <i>PRICKLE4</i> | -<br>0.13<br>a  | -<br>0.06<br>a  | -<br>0.03<br>a  | -<br>0.02<br>a  | -<br>0.07<br>a  | -<br>0.13<br>a  | -<br>0.29<br>a  | -<br>0.13<br>a  | 6 | 41780762 | 41787372 | 0.02  | NA    | -0.04 | 1.07E-05  |
| <i>TOMM6</i>    | -<br>0.11<br>a  | -<br>0.03<br>a  | -<br>0.08<br>a  | -<br>0.32<br>a  | -<br>0.13<br>a  | -<br>0.02<br>a  | -<br>1.24<br>b  | -<br>0.03<br>a  | 6 | 41787662 | 41789898 | -0.04 | NA    | -0.04 | 7.35E-70  |
| <i>USP49</i>    | -<br>0.01<br>a  | -<br>0.03<br>a  | -<br>0.04<br>a  | -<br>0.00<br>a  | -<br>0.05<br>ab | -<br>0.11<br>ab | -<br>0.65<br>b  | -<br>0.06<br>a  | 6 | 41789896 | 41895361 | 0.01  | NA    | -0.04 | 2.95E-17  |
| <i>MED20</i>    | -<br>0.05<br>a  | -<br>0.02<br>a  | -<br>0.09<br>a  | -<br>0.15<br>a  | -<br>0.06<br>a  | -<br>0.08<br>a  | -<br>1.28<br>b  | -<br>0.06<br>a  | 6 | 41905354 | 41921139 | 0.05  | NA    | -0.04 | 2.09E-72  |
| <i>BYSL</i>     | -<br>0.17<br>a  | -<br>0.03<br>a  | -<br>0.10<br>a  | -<br>0.19<br>a  | -<br>0.28<br>ab | -<br>0.00<br>a  | -<br>1.09<br>b  | -<br>0.18<br>a  | 6 | 41921188 | 41933046 | 0.03  | NA    | -0.04 | 3.39E-58  |
| <i>CCND3</i>    | -<br>0.01<br>a  | -<br>0.14<br>a  | -<br>0.02<br>a  | -<br>0.40<br>a  | -<br>0.12<br>a  | -<br>0.16<br>a  | -<br>0.77<br>b  | -<br>0.09<br>a  | 6 | 41934933 | 42050357 | -0.05 | NA    | -0.04 | 1.24E-30  |
| <i>TAF8</i>     | -<br>0.08<br>a  | -<br>0.12<br>a  | -<br>0.00<br>a  | -<br>0.29<br>a  | -<br>0.02<br>a  | -<br>0.10<br>a  | -<br>1.06<br>b  | -<br>0.16<br>a  | 6 | 42050513 | 42087461 | 0.01  | NA    | -0.04 | 2.53E-50  |
| <i>GUCA1A</i>   | -<br>0.03<br>b  | -<br>0.15<br>b  | -<br>0.06<br>b  | -<br>0.91<br>a  | -<br>0.00<br>b  | -<br>0.05<br>b  | -<br>2.16<br>c  | -<br>0.04<br>b  | 6 | 42155406 | 42180056 | NA    | -0.04 | -0.04 | 5.46E-242 |
| <i>GUCA1B</i>   | -<br>0.06<br>ab | -<br>0.10<br>ab | -<br>0.04<br>ab | -<br>0.36<br>a  | -<br>0.12<br>ab | -<br>0.06<br>ab | -<br>0.29<br>b  | -<br>0.13<br>ab | 6 | 42184401 | 42194916 | 0.02  | NA    | -0.04 | 3.81E-08  |
| <i>MRPS10</i>   | -<br>0.11<br>a  | -<br>0.03<br>a  | -<br>0.08<br>a  | -<br>0.14<br>a  | -<br>0.18<br>a  | -<br>0.02<br>a  | -<br>1.22<br>b  | -<br>0.15<br>a  | 6 | 42206801 | 42217865 | 0.01  | NA    | -0.04 | 5.96E-67  |
| <i>TRERF1</i>   | -<br>0.01<br>b  | -<br>0.15<br>b  | -<br>0.05<br>b  | -<br>0.92<br>a  | -<br>0.03<br>b  | -<br>0.10<br>b  | -<br>2.05<br>c  | -<br>0.09<br>b  | 6 | 42224931 | 42452051 | 0.07  | 0.08  | -0.04 | 6.77E-218 |

|                 |             |            |            |           |             |             |            |             |   |          |          |       |    |       |          |
|-----------------|-------------|------------|------------|-----------|-------------|-------------|------------|-------------|---|----------|----------|-------|----|-------|----------|
| <i>UBR2</i>     | 0.03<br>a   | 0.11<br>a  | 0.03<br>a  | 0.22<br>a | 0.11<br>a   | 0.11<br>a   | 0.94<br>b  | 0.06<br>a   | 6 | 42564062 | 42693504 | 0.03  | NA | -0.04 | 4.27E-38 |
| <i>TBCC</i>     | 0.08<br>a   | 0.06<br>a  | 0.04<br>a  | 0.40<br>a | 0.05<br>a   | 0.09<br>a   | 1.01<br>b  | 0.04<br>a   | 6 | 42744481 | 42746096 | 0.00  | NA | -0.04 | 2.47E-46 |
| <i>BICRAL</i>   | 0.10<br>a   | 0.13<br>a  | 0.02<br>a  | 0.28<br>a | 0.32<br>a   | 0.10<br>a   | 0.60<br>b  | 0.16<br>a   | 6 | 42746958 | 42868560 | 0.00  | NA | -0.04 | 9.26E-20 |
| <i>RPL7L1</i>   | 0.10<br>a   | 0.09<br>a  | 0.04<br>a  | 0.29<br>a | 0.08<br>a   | 0.01<br>a   | 1.01<br>b  | 0.04<br>a   | 6 | 42879618 | 42889925 | 0.02  | NA | -0.04 | 2.92E-45 |
| <i>C6orf226</i> | 0.07<br>a   | 0.04<br>a  | 0.00<br>a  | 0.29<br>a | 0.02<br>ab  | 0.07<br>a   | 0.68<br>b  | 0.22<br>a   | 6 | 42890265 | 42890816 | 0.08  | NA | -0.04 | 2.97E-20 |
| <i>CNPY3</i>    | 0.06<br>ab  | 0.09<br>ab | 0.01<br>b  | 0.54<br>a | 0.28<br>ab  | 0.12<br>ab  | 0.96<br>c  | 0.05<br>ab  | 6 | 42929192 | 42939287 | -0.07 | NA | -0.04 | 3.29E-46 |
| <i>GNMT</i>     | 0.09<br>abc | 0.26<br>ab | 0.10<br>c  | 0.48<br>a | 0.18<br>abc | 0.02<br>abc | 0.09<br>bc | 0.21<br>abc | 6 | 42960758 | 42963880 | 0.00  | NA | -0.04 | 3.01E-22 |
| <i>PEX6</i>     | 0.03<br>a   | 0.15<br>a  | 0.02<br>a  | 0.34<br>a | 0.04<br>ab  | 0.06<br>a   | 0.64<br>b  | 0.07<br>a   | 6 | 42963870 | 42979220 | 0.02  | NA | -0.04 | 1.66E-21 |
| <i>PPP2R5D</i>  | 0.08<br>a   | 0.09<br>a  | 0.05<br>a  | 0.32<br>a | 0.03<br>a   | 0.00<br>a   | 1.18<br>b  | 0.05<br>a   | 6 | 42984499 | 43012342 | 0.05  | NA | -0.04 | 2.00E-61 |
| <i>MEAI</i>     | 0.08<br>a   | 0.05<br>a  | 0.06<br>a  | 0.36<br>a | 0.08<br>a   | 0.01<br>a   | 1.22<br>b  | 0.00<br>a   | 6 | 43012094 | 43013968 | 0.04  | NA | -0.04 | 3.13E-66 |
| <i>KLHDC3</i>   | 0.02<br>a   | 0.12<br>a  | 0.02<br>a  | 0.43<br>a | 0.10<br>a   | 0.17<br>a   | 1.14<br>b  | 0.04<br>a   | 6 | 43014103 | 43021298 | 0.04  | NA | -0.04 | 3.64E-60 |
| <i>RRP36</i>    | 0.07<br>a   | 0.06<br>a  | 0.06<br>a  | 0.30<br>a | 0.02<br>a   | 0.02<br>a   | 1.18<br>b  | 0.03<br>a   | 6 | 43021645 | 43034156 | 0.06  | NA | -0.04 | 2.84E-61 |
| <i>CUL7</i>     | 0.01<br>a   | 0.05<br>a  | 0.04<br>a  | 0.25<br>a | 0.05<br>a   | 0.12<br>a   | 0.92<br>b  | 0.20<br>a   | 6 | 43037617 | 43053945 | 0.04  | NA | -0.04 | 6.30E-37 |
| <i>KLC4</i>     | 0.02<br>a   | 0.06<br>a  | 0.00<br>a  | 0.39<br>a | 0.28<br>a   | 0.25<br>a   | 0.86<br>b  | 0.15<br>a   | 6 | 43040777 | 43075099 | 0.02  | NA | -0.04 | 3.94E-37 |
| <i>MRPL2</i>    | 0.08<br>a   | 0.01<br>a  | 0.06<br>a  | 0.39<br>a | 0.29<br>a   | 0.17<br>a   | 1.15<br>b  | 0.03<br>a   | 6 | 43054029 | 43059806 | -0.02 | NA | -0.04 | 2.73E-61 |
| <i>PTK7</i>     | 0.00<br>a   | 0.01<br>a  | 0.02<br>a  | 0.18<br>a | 0.28<br>ab  | 0.09<br>a   | 0.56<br>b  | 0.05<br>a   | 6 | 43076268 | 43161719 | -0.06 | NA | -0.04 | 1.39E-12 |
| <i>SRF</i>      | 0.11<br>a   | 0.09<br>a  | 0.02<br>a  | 0.30<br>a | 0.26<br>a   | 0.15<br>a   | 0.75<br>b  | 0.06<br>a   | 6 | 43171299 | 43181507 | 0.03  | NA | -0.04 | 6.28E-27 |
| <i>CUL9</i>     | 0.09<br>a   | 0.08<br>a  | 0.01<br>a  | 0.33<br>a | 0.03<br>a   | 0.01<br>a   | 0.89<br>b  | 0.07<br>a   | 6 | 43182175 | 43224587 | -0.08 | NA | -0.04 | 1.75E-34 |
| <i>DNPH1</i>    | 0.02<br>a   | 0.05<br>a  | 0.02<br>a  | 0.33<br>a | 0.12<br>ab  | 0.21<br>a   | 0.74<br>b  | 0.28<br>a   | 6 | 43225629 | 43229484 | 0.08  | NA | -0.04 | 1.48E-27 |
| <i>CRIP3</i>    | 0.16<br>ab  | 0.07<br>ab | 0.08<br>ab | 0.30<br>a | 0.25<br>ab  | 0.29<br>a   | 0.12<br>ab | 0.34<br>a   | 6 | 43299710 | 43308797 | 0.08  | NA | -0.04 | 2.50E-16 |
| <i>ZNF318</i>   | 0.00<br>a   | 0.08<br>a  | 0.04<br>a  | 0.16<br>a | 0.08<br>a   | 0.11<br>a   | 0.85<br>b  | 0.02<br>a   | 6 | 43307134 | 43369478 | -0.06 | NA | -0.04 | 3.81E-30 |
| <i>ABCC10</i>   | 0.13<br>a   | 0.02<br>a  | 0.07<br>a  | 0.25<br>a | 0.00<br>a   | 0.02<br>a   | 0.90<br>b  | 0.05<br>a   | 6 | 43427366 | 43450430 | 0.04  | NA | -0.04 | 4.20E-37 |
| <i>TJAPI</i>    | 0.07<br>a   | 0.12<br>a  | 0.05<br>a  | 0.36<br>a | 0.26<br>a   | 0.04<br>a   | 1.15<br>b  | 0.04<br>a   | 6 | 43477523 | 43506556 | 0.07  | NA | -0.04 | 1.10E-60 |

|                 |            |            |            |            |            |            |           |            |   |          |          |       |       |       |           |
|-----------------|------------|------------|------------|------------|------------|------------|-----------|------------|---|----------|----------|-------|-------|-------|-----------|
| <i>LRRC73</i>   | 0.09<br>ab | 0.02<br>ab | 0.01<br>ab | 0.38<br>a  | 0.22<br>ab | 0.11<br>ab | 0.35<br>b | 0.11<br>ab | 6 | 43506969 | 43510686 | 0.01  | NA    | -0.04 | 1.32E-08  |
| <i>POLRIC</i>   | 0.12<br>a  | 0.00<br>a  | 0.06<br>a  | 0.37<br>a  | 0.02<br>a  | 0.09<br>a  | 1.15<br>b | 0.09<br>a  | 6 | 43509702 | 43529585 | 0.03  | NA    | -0.04 | 3.73E-60  |
| <i>YIPF3</i>    | 0.01<br>b  | 0.11<br>ab | 0.02<br>b  | 0.47<br>a  | 0.21<br>ab | 0.04<br>ab | 1.09<br>c | 0.06<br>ab | 6 | 43511827 | 43516990 | -0.09 | NA    | -0.04 | 9.49E-55  |
| <i>XPO5</i>     | 0.17<br>a  | 0.07<br>a  | 0.12<br>a  | 0.18<br>a  | 0.11<br>a  | 0.14<br>a  | 1.15<br>b | 0.08<br>a  | 6 | 43522330 | 43576075 | -0.08 | NA    | -0.04 | 9.67E-68  |
| <i>POLH</i>     | 0.01<br>b  | 0.16<br>b  | 0.06<br>b  | 0.94<br>a  | 0.02<br>b  | 0.04<br>b  | 2.14<br>c | 0.06<br>b  | 6 | 43576150 | 43615660 | 0.01  | -0.39 | -0.04 | 4.63E-239 |
| <i>GTPBP2</i>   | 0.16<br>b  | 0.01<br>ab | 0.10<br>a  | 0.06<br>ab | 0.35<br>bc | 0.02<br>ab | 1.00<br>c | 0.11<br>ab | 6 | 43605316 | 43629162 | 0.00  | NA    | -0.04 | 4.93E-48  |
| <i>MAD2L1BP</i> | 0.09<br>a  | 0.09<br>a  | 0.05<br>a  | 0.32<br>a  | 0.02<br>a  | 0.10<br>a  | 1.11<br>b | 0.15<br>a  | 6 | 43629540 | 43640952 | 0.04  | NA    | -0.04 | 1.38E-55  |
| <i>MRPS18A</i>  | 0.02<br>a  | 0.01<br>a  | 0.04<br>a  | 0.46<br>a  | 0.07<br>a  | 0.11<br>a  | 1.14<br>b | 0.04<br>a  | 6 | 43671303 | 43687791 | 0.02  | NA    | -0.04 | 3.73E-59  |
| <i>VEGFA</i>    | 0.16<br>ab | 0.00<br>ab | 0.04<br>ab | 0.14<br>a  | 0.07<br>ab | 0.05<br>ab | 0.50<br>b | 0.03<br>ab | 6 | 43770184 | 43786487 | 0.02  | NA    | -0.04 | 6.75E-12  |
| <i>MRPL14</i>   | 0.16<br>b  | 0.04<br>ab | 0.05<br>ab | 0.37<br>a  | 0.25<br>bc | 0.16<br>ab | 0.98<br>c | 0.00<br>ab | 6 | 44113454 | 44127457 | 0.03  | NA    | -0.04 | 8.68E-47  |
| <i>TMEM63B</i>  | 0.04<br>a  | 0.06<br>a  | 0.07<br>a  | 0.20<br>a  | 0.35<br>ab | 0.16<br>a  | 1.01<br>b | 0.21<br>a  | 6 | 44126914 | 44155519 | -0.09 | NA    | -0.04 | 1.97E-48  |
| <i>CAPN11</i>   | 0.13<br>ab | 0.15<br>ab | 0.07<br>b  | 0.42<br>a  | 0.07<br>ab | 0.03<br>ab | 0.09<br>b | 0.25<br>ab | 6 | 44158811 | 44184402 | 0.02  | NA    | -0.04 | 3.67E-12  |
| <i>SLC29A1</i>  | 0.00<br>a  | 0.02<br>a  | 0.06<br>a  | 0.14<br>a  | 0.30<br>ab | 0.10<br>a  | 0.74<br>b | 0.08<br>a  | 6 | 44219505 | 44234151 | 0.06  | NA    | -0.04 | 6.62E-24  |
| <i>HSP90AB1</i> | 0.19<br>a  | 0.03<br>a  | 0.10<br>a  | 0.30<br>a  | 0.18<br>a  | 0.15<br>a  | 1.13<br>b | 0.19<br>a  | 6 | 44246166 | 44253888 | 0.00  | NA    | -0.04 | 1.20E-65  |
| <i>SLC35B2</i>  | 0.09<br>a  | 0.01<br>a  | 0.05<br>a  | 0.33<br>a  | 0.06<br>a  | 0.09<br>a  | 1.12<br>b | 0.15<br>a  | 6 | 44254096 | 44257890 | 0.04  | NA    | -0.04 | 7.46E-56  |
| <i>NFKBIE</i>   | 0.06<br>ab | 0.00<br>a  | 0.01<br>a  | 0.25<br>a  | 0.04<br>ab | 0.21<br>a  | 0.64<br>b | 0.22<br>a  | 6 | 44258166 | 44265788 | -0.09 | NA    | -0.04 | 5.80E-20  |
| <i>AARS2</i>    | 0.06<br>a  | 0.02<br>a  | 0.05<br>a  | 0.33<br>a  | 0.25<br>ab | 0.07<br>a  | 1.04<br>b | 0.02<br>a  | 6 | 44299654 | 44313326 | -0.07 | NA    | -0.04 | 8.22E-48  |
| <i>CDC5L</i>    | 0.07<br>a  | 0.08<br>a  | 0.04<br>a  | 0.25<br>a  | 0.03<br>a  | 0.04<br>a  | 1.06<br>b | 0.06<br>a  | 6 | 44387525 | 44450426 | 0.00  | NA    | -0.04 | 1.54E-48  |
| <i>SUPT3H</i>   | 0.12<br>a  | 0.04<br>a  | 0.00<br>a  | 0.22<br>a  | 0.20<br>a  | 0.06<br>a  | 0.70<br>b | 0.04<br>a  | 6 | 44809317 | 45377953 | 0.02  | NA    | -0.04 | 7.20E-21  |
| <i>SLC25A27</i> | 0.05<br>b  | 0.00<br>b  | 0.03<br>b  | 0.23<br>ab | 0.23<br>ab | 0.34<br>a  | 0.11<br>b | 0.11<br>ab | 6 | 46652915 | 46678193 | 0.02  | NA    | -0.04 | 1.55E-08  |
| <i>TDRD6</i>    | 0.02<br>b  | 0.09<br>b  | 0.05<br>b  | 1.29<br>a  | 0.12<br>b  | 0.06<br>b  | 1.72<br>c | 0.06<br>b  | 6 | 46687875 | 46704319 | -0.02 | 0.08  | -0.04 | 1.46E-176 |
| <i>CD2AP</i>    | 0.05<br>ab | 0.04<br>a  | 0.03<br>a  | 0.23<br>a  | 0.02<br>ab | 0.04<br>ab | 0.68<br>b | 0.11<br>a  | 6 | 47477789 | 47627263 | -0.09 | NA    | -0.04 | 3.75E-19  |
| <i>MUT</i>      | 0.03<br>ab | 0.08<br>a  | 0.01<br>a  | 0.39<br>a  | 0.01<br>ab | 0.01<br>a  | 0.57<br>b | 0.01<br>ab | 6 | 49430360 | 49463191 | 0.07  | NA    | -0.04 | 1.43E-15  |

|                 |                  |                 |                 |                 |                  |                  |                 |                  |   |          |          |       |       |       |           |
|-----------------|------------------|-----------------|-----------------|-----------------|------------------|------------------|-----------------|------------------|---|----------|----------|-------|-------|-------|-----------|
| <i>CENPQ</i>    | -<br>0.21<br>a   | -<br>0.05<br>a  | -<br>0.10<br>a  | -<br>0.10<br>a  | -<br>0.21<br>ab  | -<br>0.06<br>a   | -<br>0.69<br>b  | -<br>0.26<br>ab  | 6 | 49463378 | 49493107 | 0.01  | NA    | -0.04 | 1.37E-29  |
| <i>MCM3</i>     | -<br>0.16<br>a   | -<br>0.05<br>a  | -<br>0.10<br>a  | -<br>0.21<br>a  | -<br>0.20<br>ab  | -<br>0.07<br>a   | -<br>0.81<br>b  | -<br>0.28<br>ab  | 6 | 52264009 | 52284881 | 0.01  | NA    | -0.04 | 3.84E-36  |
| <i>PAQR8</i>    | -<br>0.08<br>b   | -<br>0.16<br>b  | -<br>0.02<br>b  | -<br>1.52<br>a  | -<br>0.11<br>b   | -<br>0.06<br>b   | -<br>1.79<br>c  | -<br>0.02<br>b   | 6 | 52361421 | 52407777 | 0.07  | 0.25  | -0.04 | 1.29E-209 |
| <i>EFHC1</i>    | -<br>0.05<br>ab  | -<br>0.04<br>ab | -<br>0.01<br>ab | -<br>0.35<br>a  | -<br>0.29<br>ab  | -<br>0.02<br>ab  | -<br>0.52<br>b  | -<br>0.16<br>ab  | 6 | 52362123 | 52529886 | 0.06  | NA    | -0.04 | 2.00E-13  |
| <i>TRAM2</i>    | -<br>0.05<br>abc | -<br>0.10<br>ab | -<br>0.01<br>bc | -<br>0.45<br>a  | -<br>0.08<br>abc | -<br>0.07<br>bc  | -<br>0.56<br>c  | -<br>0.08<br>abc | 6 | 52497402 | 52576915 | 0.00  | NA    | -0.04 | 1.72E-17  |
| <i>TMEM14A</i>  | -<br>0.08<br>ab  | -<br>0.03<br>ab | -<br>0.09<br>a  | -<br>0.28<br>a  | -<br>0.14<br>abc | -<br>0.15<br>abc | -<br>0.79<br>c  | -<br>0.36<br>bc  | 6 | 52671109 | 52686588 | 0.04  | NA    | -0.04 | 1.78E-35  |
| <i>GSTA4</i>    | -<br>0.11<br>ab  | -<br>0.08<br>ab | -<br>0.02<br>ab | -<br>0.30<br>a  | -<br>0.34<br>a   | -<br>0.11<br>ab  | -<br>0.42<br>ab | -<br>0.11<br>ab  | 6 | 52977948 | 52995378 | -0.03 | NA    | -0.04 | 1.99E-11  |
| <i>ICK</i>      | -<br>0.02<br>ab  | -<br>0.10<br>ab | -<br>0.02<br>ab | -<br>0.44<br>a  | -<br>0.23<br>ab  | -<br>0.25<br>bc  | -<br>0.66<br>c  | -<br>0.04<br>ab  | 6 | 53001279 | 53061802 | -0.03 | NA    | -0.04 | 4.90E-26  |
| <i>FBXO9</i>    | -<br>0.02<br>bc  | -<br>0.10<br>bc | -<br>0.02<br>bc | -<br>0.61<br>a  | -<br>0.13<br>abc | -<br>0.06<br>bc  | -<br>0.55<br>c  | -<br>0.13<br>ab  | 6 | 53051991 | 53100873 | 0.02  | NA    | -0.04 | 1.42E-21  |
| <i>GCM1</i>     | -<br>0.12<br>a   | -<br>0.06<br>a  | -<br>0.03<br>a  | -<br>0.35<br>a  | -<br>0.06<br>a   | -<br>0.10<br>a   | -<br>0.17<br>a  | -<br>0.11<br>a   | 6 | 53126964 | 53148829 | 0.01  | NA    | -0.04 | 1.37E-05  |
| <i>ELOVL5</i>   | -<br>0.04<br>ab  | -<br>0.11<br>ab | -<br>0.02<br>b  | -<br>0.51<br>a  | -<br>0.28<br>ab  | -<br>0.20<br>b   | -<br>0.28<br>b  | -<br>0.03<br>ab  | 6 | 53267398 | 53349179 | 0.04  | NA    | -0.04 | 1.81E-12  |
| <i>GCLC</i>     | -<br>0.02<br>ab  | -<br>0.01<br>ab | -<br>0.06<br>ab | -<br>0.21<br>a  | -<br>0.06<br>ab  | -<br>0.26<br>ab  | -<br>0.70<br>b  | -<br>0.12<br>ab  | 6 | 53497341 | 53616970 | 0.02  | NA    | -0.04 | 1.37E-25  |
| <i>KLHL31</i>   | -<br>0.03<br>ab  | -<br>0.01<br>ab | -<br>0.02<br>ab | -<br>0.32<br>a  | -<br>0.02<br>ab  | -<br>0.14<br>ab  | -<br>0.36<br>b  | -<br>0.13<br>ab  | 6 | 53647901 | 53665708 | 0.00  | NA    | -0.04 | 5.98E-08  |
| <i>LRRC1</i>    | -<br>0.03<br>a   | -<br>0.02<br>a  | -<br>0.05<br>a  | -<br>0.14<br>a  | -<br>0.13<br>ab  | -<br>0.24<br>ab  | -<br>0.59<br>b  | -<br>0.08<br>a   | 6 | 53794497 | 53924121 | 0.01  | NA    | -0.04 | 2.03E-17  |
| <i>DST</i>      | -<br>0.09<br>a   | -<br>0.06<br>a  | -<br>0.02<br>ab | -<br>0.03<br>ab | -<br>0.10<br>ab  | -<br>0.13<br>ab  | -<br>0.40<br>b  | -<br>0.18<br>ab  | 6 | 56457987 | 56954628 | 0.00  | NA    | -0.03 | 4.53E-08  |
| <i>KIAA1586</i> | -<br>0.06<br>ab  | -<br>0.08<br>ab | -<br>0.01<br>ab | -<br>0.19<br>a  | -<br>0.12<br>ab  | -<br>0.00<br>ab  | -<br>0.58<br>b  | -<br>0.16<br>a   | 6 | 57046532 | 57055239 | 0.04  | NA    | -0.03 | 2.59E-14  |
| <i>ZNF451</i>   | -<br>0.04<br>a   | -<br>0.10<br>a  | -<br>0.01<br>a  | -<br>0.36<br>a  | -<br>0.12<br>ab  | -<br>0.03<br>a   | -<br>0.55<br>b  | -<br>0.07<br>a   | 6 | 57086844 | 57170307 | -0.04 | NA    | -0.03 | 6.26E-15  |
| <i>BAG2</i>     | -<br>0.06<br>ab  | -<br>0.11<br>ab | -<br>0.06<br>b  | -<br>0.17<br>ab | -<br>0.08<br>ab  | -<br>0.24<br>a   | -<br>0.16<br>b  | -<br>0.13<br>ab  | 6 | 57172326 | 57189833 | 0.00  | NA    | -0.03 | 4.47E-08  |
| <i>PRIM2</i>    | -<br>0.18<br>ab  | -<br>0.05<br>a  | -<br>0.05<br>a  | -<br>0.21<br>a  | -<br>0.05<br>ab  | -<br>0.05<br>ab  | -<br>0.53<br>b  | -<br>0.16<br>ab  | 6 | 57314805 | 57646849 | 0.02  | NA    | -0.03 | 1.93E-15  |
| <i>GUSBP4</i>   | -<br>0.03<br>a   | -<br>0.02<br>a  | -<br>0.03<br>a  | -<br>0.27<br>a  | -<br>0.07<br>ab  | -<br>0.03<br>a   | -<br>0.57<br>b  | -<br>0.00<br>a   | 6 | 57919784 | 57930291 | -0.02 | NA    | -0.03 | 1.83E-13  |
| <i>PHF3</i>     | -<br>0.01<br>a   | -<br>0.13<br>a  | -<br>0.02<br>a  | -<br>0.01<br>a  | -<br>0.35<br>a   | -<br>0.06<br>a   | -<br>0.24<br>a  | -<br>0.14<br>a   | 6 | 63635820 | 63779336 | 0.07  | NA    | -0.01 | 2.09E-05  |
| <i>THSD7A</i>   | -<br>0.04<br>ab  | -<br>0.20<br>a  | -<br>0.13<br>ab | -<br>0.42<br>a  | -<br>0.55<br>a   | -<br>0.35<br>a   | -<br>0.20<br>ab | -<br>0.18<br>ab  | 7 | 11370357 | 11832198 | NA    | -0.01 | NA    | 1.35E-31  |
| <i>INTS4P2</i>  | -<br>0.00<br>b   | -<br>0.00<br>b  | -<br>0.05<br>b  | -<br>0.13<br>ab | -<br>0.15<br>b   | -<br>0.58<br>a   | -<br>0.01<br>b  | -<br>0.23<br>b   | 7 | 65647823 | 65718688 | 0.00  | NA    | NA    | 6.07E-21  |

|                 |                 |                 |                 |             |             |            |             |            |    |           |           |       |       |      |          |
|-----------------|-----------------|-----------------|-----------------|-------------|-------------|------------|-------------|------------|----|-----------|-----------|-------|-------|------|----------|
| <b>ARHGEF10</b> | -<br>0.17<br>a  | -<br>0.06<br>a  | -<br>0.03<br>a  | 0.14<br>a   | 0.38<br>a   | 0.20<br>a  | 0.15<br>a   | 0.03<br>a  | 8  | 1823976   | 1958641   | NA    | -0.01 | NA   | 1.05E-06 |
| <b>HTRA4</b>    | -<br>0.17<br>b  | -<br>0.07<br>ab | -<br>0.03<br>ab | 0.10<br>ab  | 0.09<br>ab  | 0.23<br>a  | 0.11<br>ab  | 0.14<br>ab | 8  | 38974164  | 38988662  | NA    | -0.01 | NA   | 2.05E-06 |
| <b>DIP2C</b>    | -<br>0.02<br>ab | -<br>0.01<br>b  | -<br>0.02<br>b  | 0.12<br>b   | 0.01<br>b   | 0.35<br>a  | 0.04<br>b   | 0.13<br>b  | 10 | 274190    | 689668    | NA    | -0.02 | NA   | 1.46E-06 |
| <b>DNA2</b>     | -<br>0.02<br>b  | -<br>0.00<br>b  | -<br>0.06<br>b  | 0.00<br>b   | 0.06<br>ab  | 0.55<br>a  | 0.06<br>b   | 0.03<br>b  | 10 | 68414064  | 68472121  | NA    | -0.02 | NA   | 7.72E-18 |
| <b>HKDC1</b>    | -<br>0.06<br>b  | -<br>0.07<br>b  | -<br>0.04<br>b  | 0.06<br>ab  | 0.03<br>ab  | 0.55<br>a  | 0.11<br>ab  | 0.23<br>ab | 10 | 69220303  | 69267559  | 0.03  | NA    | NA   | 4.08E-20 |
| <b>CTBP2</b>    | -<br>0.10<br>b  | -<br>0.08<br>b  | -<br>0.10<br>b  | 0.13<br>ab  | 0.08<br>b   | 0.51<br>a  | 0.17<br>ab  | 0.09<br>b  | 10 | 124984317 | 125161170 | NA    | NA    | NA   | 5.97E-23 |
| <b>FAM196A</b>  | -<br>0.04<br>b  | -<br>0.10<br>b  | -<br>0.02<br>b  | 0.09<br>b   | 0.04<br>ab  | 0.39<br>a  | 0.21<br>b   | 0.33<br>b  | 10 | 127135426 | 127196158 | 0.06  | NA    | NA   | 9.00E-14 |
| <b>CSNK2A3</b>  | -<br>0.51<br>c  | -<br>0.38<br>a  | -<br>0.08<br>bc | 0.23<br>ab  | 0.18<br>abc | 0.22<br>ab | 0.20<br>ab  | 0.21<br>ab | 11 | 11351942  | 11353357  | 0.00  | NA    | NA   | 8.41E-53 |
| <b>FOLH1</b>    | -<br>0.06<br>a  | -<br>0.14<br>a  | -<br>0.06<br>a  | 0.31<br>a   | 0.28<br>a   | 0.10<br>a  | 0.13<br>a   | 0.10<br>a  | 11 | 49146635  | 49208670  | 0.06  | NA    | NA   | 6.03E-08 |
| <b>MRPL16</b>   | -<br>0.12<br>b  | -<br>0.13<br>b  | -<br>0.00<br>b  | 0.13<br>b   | 0.01<br>ab  | 0.50<br>a  | 0.00<br>b   | 0.09<br>ab | 11 | 59806135  | 59810872  | 0.03  | NA    | 0.00 | 8.72E-17 |
| <b>EIF1AD</b>   | -<br>0.23<br>ab | -<br>0.07<br>ab | -<br>0.09<br>b  | 0.27<br>ab  | 0.02<br>ab  | 0.28<br>a  | 0.18<br>ab  | 0.21<br>b  | 11 | 65996545  | 66002176  | 0.00  | NA    | 0.01 | 5.57E-17 |
| <b>SF3B2</b>    | -<br>0.11<br>a  | -<br>0.03<br>a  | -<br>0.03<br>a  | 0.21<br>a   | 0.20<br>a   | 0.21<br>a  | 0.07<br>a   | 0.27<br>a  | 11 | 66050729  | 66069308  | 0.02  | NA    | 0.01 | 4.31E-06 |
| <b>PACSI</b>    | -<br>0.11<br>b  | -<br>0.07<br>b  | -<br>0.01<br>b  | 0.06<br>ab  | 0.15<br>b   | 0.32<br>a  | 0.02<br>ab  | 0.26<br>b  | 11 | 66070363  | 66244747  | 0.03  | NA    | 0.02 | 4.39E-08 |
| <b>KLC2</b>     | -<br>0.11<br>b  | -<br>0.03<br>b  | -<br>0.06<br>b  | 0.15<br>ab  | 0.06<br>b   | 0.58<br>a  | 0.05<br>b   | 0.18<br>b  | 11 | 66257294  | 66267860  | 0.07  | NA    | 0.02 | 1.75E-22 |
| <b>RAB1B</b>    | -<br>0.04<br>b  | -<br>0.08<br>b  | -<br>0.00<br>b  | 0.06<br>ab  | 0.29<br>b   | 0.42<br>a  | 0.06<br>b   | 0.40<br>b  | 11 | 66268533  | 66277492  | 0.05  | NA    | 0.02 | 5.73E-14 |
| <b>YIF1A</b>    | -<br>0.17<br>ab | -<br>0.07<br>ab | -<br>0.05<br>bc | 0.00<br>abc | 0.03<br>abc | 0.31<br>a  | 0.04<br>abc | 0.42<br>c  | 11 | 66284580  | 66289170  | 0.01  | NA    | 0.02 | 3.28E-13 |
| <b>BRMS1</b>    | -<br>0.15<br>ab | -<br>0.05<br>ab | -<br>0.07<br>b  | 0.16<br>ab  | 0.03<br>ab  | 0.38<br>a  | 0.06<br>ab  | 0.22<br>b  | 11 | 66337333  | 66345125  | 0.03  | NA    | 0.03 | 1.47E-13 |
| <b>MRPL11</b>   | -<br>0.16<br>ab | -<br>0.10<br>ab | -<br>0.07<br>b  | 0.19<br>ab  | 0.00<br>ab  | 0.28<br>a  | 0.06<br>ab  | 0.16<br>b  | 11 | 66435075  | 66466738  | 0.02  | NA    | 0.03 | 4.33E-11 |
| <b>PELI3</b>    | -<br>0.02<br>b  | -<br>0.06<br>b  | -<br>0.03<br>b  | 0.06<br>b   | 0.23<br>b   | 0.60<br>a  | 0.06<br>b   | 0.34<br>b  | 11 | 66466327  | 66477337  | -0.04 | NA    | 0.03 | 1.59E-23 |
| <b>DPP3</b>     | -<br>0.17<br>b  | -<br>0.09<br>b  | -<br>0.10<br>b  | 0.19<br>ab  | 0.19<br>b   | 0.54<br>a  | 0.06<br>b   | 0.17<br>b  | 11 | 66480013  | 66509657  | 0.07  | NA    | 0.03 | 2.36E-27 |
| <b>BBS1</b>     | -<br>0.12<br>b  | -<br>0.09<br>b  | -<br>0.04<br>ab | 0.06<br>ab  | 0.51<br>b   | 0.28<br>a  | 0.07<br>ab  | 0.43<br>b  | 11 | 66510606  | 66533627  | 0.03  | NA    | 0.03 | 1.69E-12 |
| <b>ZDHHC24</b>  | -<br>0.08<br>b  | -<br>0.04<br>b  | -<br>0.05<br>bc | 0.03<br>bc  | 0.23<br>bc  | 0.63<br>a  | 0.04<br>bc  | 0.52<br>c  | 11 | 66520637  | 66546238  | 0.04  | NA    | 0.03 | 1.25E-30 |
| <b>CCDC87</b>   | -<br>0.02<br>b  | -<br>0.04<br>b  | -<br>0.01<br>b  | 0.00<br>ab  | 0.27<br>b   | 0.40<br>a  | 0.07<br>ab  | 0.29<br>b  | 11 | 66590176  | 66593083  | 0.03  | NA    | 0.03 | 1.31E-10 |

|                 |            |            |            |             |            |           |            |           |    |          |          |       |       |      |           |
|-----------------|------------|------------|------------|-------------|------------|-----------|------------|-----------|----|----------|----------|-------|-------|------|-----------|
| <i>CCS</i>      | 0.04<br>ab | 0.08<br>bc | 0.01<br>ab | 0.01<br>abc | 0.13<br>bc | 0.31<br>a | 0.11<br>bc | 0.50<br>c | 11 | 66592821 | 66606019 | -0.01 | NA    | 0.03 | 2.67E-11  |
| <i>RBM4</i>     | 0.01<br>b  | 0.09<br>b  | 0.00<br>b  | 0.07<br>ab  | 0.30<br>b  | 0.40<br>a | 0.01<br>b  | 0.29<br>b | 11 | 66638617 | 66666682 | 0.10  | NA    | 0.04 | 2.04E-11  |
| <i>CI1orf30</i> | 0.12<br>b  | 0.06<br>b  | 0.06<br>b  | 0.12<br>ab  | 0.14<br>ab | 0.49<br>a | 0.07<br>b  | 0.31<br>b | 11 | 66744451 | 66843328 | 0.05  | NA    | 0.04 | 2.06E-19  |
| <i>RCE1</i>     | 0.09<br>b  | 0.10<br>b  | 0.11<br>b  | 0.31<br>ab  | 0.07<br>b  | 0.69<br>a | 0.10<br>b  | 0.22<br>b | 11 | 66842835 | 66846546 | -0.03 | NA    | 0.04 | 4.34E-40  |
| <i>PC</i>       | 0.06<br>ab | 0.12<br>b  | 0.02<br>b  | 0.03<br>ab  | 0.07<br>b  | 0.43<br>a | 0.05<br>ab | 0.12<br>b | 11 | 66848233 | 66958376 | 0.06  | NA    | 0.04 | 5.98E-12  |
| <i>LRFN4</i>    | 0.19<br>ab | 0.09<br>b  | 0.09<br>b  | 0.01<br>b   | 0.21<br>ab | 0.47<br>a | 0.01<br>b  | 0.11<br>b | 11 | 66856647 | 66860475 | 0.01  | NA    | 0.04 | 8.26E-21  |
| <i>RHOD</i>     | 0.04<br>b  | 0.01<br>ab | 0.01<br>b  | 0.13<br>ab  | 0.10<br>ab | 0.30<br>a | 0.03<br>b  | 0.28<br>b | 11 | 67056818 | 67072013 | 0.02  | NA    | 0.04 | 2.78E-06  |
| <i>KDM2A</i>    | 0.03<br>b  | 0.02<br>b  | 0.06<br>b  | 0.20<br>b   | 0.15<br>b  | 0.82<br>a | 0.02<br>b  | 0.40<br>b | 11 | 67119269 | 67258087 | 0.08  | NA    | 0.04 | 6.02E-46  |
| <i>GRK2</i>     | 0.09<br>b  | 0.05<br>b  | 0.03<br>b  | 0.11<br>b   | 0.23<br>b  | 0.56<br>a | 0.11<br>b  | 0.26<br>b | 11 | 67266410 | 67286556 | 0.04  | NA    | 0.04 | 1.20E-20  |
| <i>ANKRD13D</i> | 0.11<br>b  | 0.01<br>b  | 0.08<br>b  | 0.17<br>b   | 0.11<br>b  | 0.75<br>a | 0.06<br>b  | 0.29<br>b | 11 | 67288547 | 67302485 | 0.03  | NA    | 0.04 | 1.54E-39  |
| <i>SSH3</i>     | 0.09<br>b  | 0.04<br>b  | 0.07<br>b  | 0.21<br>ab  | 0.13<br>ab | 0.63<br>a | 0.10<br>b  | 0.34<br>b | 11 | 67303448 | 67312607 | 0.08  | NA    | 0.04 | 1.02E-29  |
| <i>RAD9A</i>    | 0.18<br>b  | 0.04<br>bc | 0.09<br>bc | 0.19<br>b   | 0.10<br>bc | 0.76<br>a | 0.02<br>bc | 0.45<br>c | 11 | 67317871 | 67398410 | -0.03 | NA    | 0.04 | 1.33E-47  |
| <i>POLD4</i>    | 0.02<br>bc | 0.06<br>bc | 0.00<br>b  | 0.17<br>bc  | 0.37<br>bc | 0.56<br>a | 0.13<br>bc | 0.49<br>c | 11 | 67350777 | 67356972 | 0.03  | NA    | 0.04 | 1.67E-25  |
| <i>PPP1CA</i>   | 0.12<br>b  | 0.01<br>bc | 0.06<br>bc | 0.06<br>bc  | 0.13<br>bc | 0.75<br>a | 0.05<br>bc | 0.41<br>c | 11 | 67398183 | 67421183 | 0.02  | NA    | 0.04 | 1.86E-39  |
| <i>RPS6KB2</i>  | 0.13<br>b  | 0.01<br>b  | 0.06<br>b  | 0.08<br>b   | 0.13<br>ab | 0.61<br>a | 0.04<br>b  | 0.49<br>b | 11 | 67428460 | 67435408 | 0.08  | NA    | 0.04 | 7.68E-30  |
| <i>CORO1B</i>   | 0.07<br>b  | 0.08<br>bc | 0.02<br>bc | 0.03<br>bc  | 0.42<br>bc | 0.66<br>a | 0.00<br>bc | 0.53<br>c | 11 | 67435510 | 67443821 | 0.02  | NA    | 0.04 | 1.20E-33  |
| <i>CABP4</i>    | 0.04<br>b  | 0.10<br>b  | 0.07<br>b  | 0.04<br>b   | 0.40<br>bc | 1.64<br>a | 0.15<br>b  | 1.06<br>c | 11 | 67452406 | 67460313 | NA    | 0.11  | 0.04 | 7.53E-214 |
| <i>TMEM134</i>  | 0.05<br>b  | 0.10<br>b  | 0.01<br>b  | 0.07<br>b   | 0.35<br>b  | 0.70<br>a | 0.07<br>b  | 0.43<br>b | 11 | 67461710 | 67469272 | -0.07 | NA    | 0.04 | 2.53E-34  |
| <i>AIP</i>      | 0.06<br>b  | 0.04<br>bc | 0.02<br>b  | 0.03<br>bc  | 0.08<br>bc | 0.54<br>a | 0.09<br>bc | 0.56<br>c | 11 | 67483041 | 67491103 | 0.06  | NA    | 0.04 | 2.70E-24  |
| <i>PITPNM1</i>  | 0.08<br>b  | 0.10<br>b  | 0.05<br>b  | 0.02<br>b   | 0.32<br>bc | 1.51<br>a | 0.14<br>b  | 1.03<br>c | 11 | 67491768 | 67506263 | 0.09  | -0.22 | 0.04 | 6.17E-181 |
| <i>CDK2AP2</i>  | 0.02<br>b  | 0.01<br>b  | 0.03<br>bc | 0.00<br>bc  | 0.18<br>bc | 0.57<br>a | 0.03<br>bc | 0.58<br>c | 11 | 67506497 | 67508649 | -0.01 | NA    | 0.04 | 5.03E-26  |
| <i>NDUFV1</i>   | 0.06<br>b  | 0.00<br>b  | 0.03<br>b  | 0.04<br>bc  | 0.06<br>bc | 0.58<br>a | 0.08<br>bc | 0.54<br>c | 11 | 67606852 | 67612535 | -0.07 | NA    | 0.04 | 3.38E-26  |
| <i>NUDT8</i>    | 0.14<br>b  | 0.06<br>ab | 0.02<br>ab | 0.10<br>ab  | 0.02<br>ab | 0.27<br>a | 0.01<br>ab | 0.33<br>b | 11 | 67627938 | 67629930 | 0.04  | NA    | 0.05 | 1.31E-07  |

|                 |            |            |            |            |            |           |            |            |    |          |          |       |       |      |           |
|-----------------|------------|------------|------------|------------|------------|-----------|------------|------------|----|----------|----------|-------|-------|------|-----------|
| <i>ALDH3B2</i>  | 0.01<br>b  | 0.01<br>b  | 0.05<br>b  | 0.25<br>ab | 0.12<br>ab | 0.54<br>a | 0.03<br>b  | 0.08<br>b  | 11 | 67662162 | 67681200 | 0.01  | NA    | 0.05 | 2.38E-18  |
| <i>UNC93B1</i>  | 0.01<br>b  | 0.08<br>b  | 0.07<br>b  | 0.02<br>b  | 0.40<br>b  | 1.66<br>a | 0.15<br>b  | 1.22<br>c  | 11 | 67991104 | 68004982 | 0.06  | -0.01 | 0.04 | 6.81E-230 |
| <i>ALDH3B1</i>  | 0.01<br>b  | 0.09<br>b  | 0.07<br>b  | 0.02<br>b  | 0.37<br>b  | 1.72<br>a | 0.16<br>b  | 1.28<br>c  | 11 | 68008578 | 68029282 | NA    | -0.05 | 0.05 | 6.74E-250 |
| <i>NDUFS8</i>   | 0.05<br>b  | 0.00<br>b  | 0.04<br>bc | 0.03<br>bc | 0.02<br>bc | 0.70<br>a | 0.06<br>bc | 0.60<br>c  | 11 | 68030617 | 68036644 | 0.01  | NA    | 0.05 | 1.45E-37  |
| <i>TCIRG1</i>   | 0.00<br>b  | 0.10<br>b  | 0.01<br>b  | 0.07<br>b  | 0.03<br>ab | 0.40<br>a | 0.17<br>b  | 0.37<br>b  | 11 | 68039016 | 68050895 | 0.00  | NA    | 0.04 | 1.32E-13  |
| <i>CHKA</i>     | 0.07<br>ab | 0.00<br>b  | 0.02<br>b  | 0.21<br>bc | 0.16<br>bc | 0.41<br>a | 0.06<br>ab | 0.66<br>c  | 11 | 68052859 | 68121444 | -0.05 | NA    | 0.04 | 1.82E-20  |
| <i>KMT5B</i>    | 0.01<br>b  | 0.11<br>b  | 0.01<br>b  | 0.15<br>b  | 0.41<br>bc | 0.74<br>a | 0.00<br>b  | 0.73<br>c  | 11 | 68154863 | 68213828 | 0.06  | NA    | 0.04 | 9.19E-48  |
| <i>C11orf24</i> | 0.01<br>bc | 0.02<br>bc | 0.06<br>bc | 0.07<br>bc | 0.02<br>bc | 0.78<br>a | 0.13<br>b  | 0.54<br>c  | 11 | 68261335 | 68272001 | 0.03  | NA    | 0.04 | 1.21E-44  |
| <i>LRP5</i>     | 0.05<br>b  | 0.12<br>b  | 0.05<br>b  | 0.08<br>b  | 0.36<br>b  | 1.64<br>a | 0.11<br>b  | 1.35<br>c  | 11 | 68312609 | 68449275 | 0.00  | -0.10 | 0.04 | 1.47E-233 |
| <i>PPP6R3</i>   | 0.04<br>b  | 0.06<br>b  | 0.05<br>b  | 0.16<br>b  | 0.23<br>bc | 0.89<br>a | 0.02<br>b  | 0.68<br>c  | 11 | 68460731 | 68615334 | 0.06  | NA    | 0.04 | 2.65E-61  |
| <i>TESMIN</i>   | 0.07<br>b  | 0.01<br>b  | 0.07<br>b  | 0.05<br>b  | 0.33<br>b  | 0.82<br>a | 0.01<br>b  | 0.38<br>b  | 11 | 68707440 | 68751564 | 0.07  | NA    | 0.04 | 3.03E-45  |
| <i>CPT1A</i>    | 0.03<br>b  | 0.14<br>b  | 0.09<br>b  | 0.08<br>b  | 0.03<br>b  | 1.85<br>a | 0.04<br>b  | 1.04<br>c  | 11 | 68754620 | 68844410 | 0.07  | -0.09 | 0.05 | 3.87E-270 |
| <i>MRPL21</i>   | 0.02<br>b  | 0.10<br>b  | 0.11<br>b  | 0.01<br>b  | 0.19<br>b  | 1.95<br>a | 0.06<br>b  | 1.03<br>c  | 11 | 68891276 | 68903835 | 0.04  | 0.19  | 0.05 | 2.94E-303 |
| <i>IGHMBP2</i>  | 0.03<br>b  | 0.11<br>b  | 0.09<br>b  | 0.01<br>b  | 0.15<br>bc | 1.76<br>a | 0.12<br>b  | 0.91<br>c  | 11 | 68903842 | 68940602 | 0.05  | -0.32 | 0.05 | 1.02E-236 |
| <i>MRGPRD</i>   | 0.02<br>ab | 0.11<br>ab | 0.01<br>ab | 0.36<br>a  | 0.10<br>ab | 0.35<br>a | 0.08<br>ab | 0.05<br>ab | 11 | 68980021 | 68980986 | 0.03  | NA    | 0.05 | 1.44E-10  |
| <i>TPCN2</i>    | 0.04<br>b  | 0.12<br>b  | 0.10<br>b  | 0.08<br>b  | 0.18<br>b  | 1.97<br>a | 0.06<br>b  | 1.05<br>c  | 11 | 69048897 | 69162440 | 0.00  | -0.16 | 0.04 | 0.00E+00  |
| <i>CCND1</i>    | 0.01<br>b  | 0.15<br>b  | 0.12<br>b  | 0.11<br>b  | 0.20<br>bc | 2.14<br>a | 0.12<br>b  | 0.86<br>c  | 11 | 69641087 | 69654474 | 0.04  | -0.02 | 0.05 | 0         |
| <i>ORAQ1</i>    | 0.01<br>b  | 0.12<br>bc | 0.12<br>bc | 0.08<br>bc | 0.06<br>bc | 2.00<br>a | 0.11<br>bc | 0.76<br>c  | 11 | 69653076 | 69675416 | 0.08  | -0.19 | 0.05 | 2.27E-302 |
| <i>ANO1</i>     | 0.08<br>b  | 0.14<br>b  | 0.12<br>b  | 0.05<br>b  | 0.02<br>b  | 2.12<br>a | 0.02<br>b  | 0.82<br>c  | 11 | 70078302 | 70189528 | 0.01  | -0.04 | 0.05 | 0         |
| <i>FADD</i>     | 0.07<br>b  | 0.05<br>bc | 0.11<br>bc | 0.18<br>b  | 0.04<br>bc | 1.43<br>a | 0.01<br>b  | 0.59<br>c  | 11 | 70203163 | 70207390 | -0.03 | NA    | 0.05 | 1.82E-147 |
| <i>PPF1A1</i>   | 0.01<br>b  | 0.11<br>b  | 0.14<br>b  | 0.17<br>b  | 0.10<br>b  | 2.10<br>a | 0.03<br>b  | 0.86<br>c  | 11 | 70270700 | 70384403 | -0.01 | 0.09  | 0.05 | 0         |
| <i>CTTN</i>     | 0.02<br>b  | 0.13<br>b  | 0.13<br>b  | 0.08<br>b  | 0.02<br>b  | 2.02<br>a | 0.00<br>b  | 0.86<br>c  | 11 | 70398404 | 70436584 | 0.03  | 0.04  | 0.05 | 0         |
| <i>SHANK2</i>   | 0.10<br>b  | 0.09<br>b  | 0.11<br>b  | 0.25<br>b  | 0.17<br>b  | 1.78<br>a | 0.07<br>b  | 0.84<br>c  | 11 | 70467856 | 71252577 | 0.04  | -0.07 | 0.05 | 3.59E-244 |



|                  |            |            |            |            |             |           |             |           |    |          |          |       |       |      |           |
|------------------|------------|------------|------------|------------|-------------|-----------|-------------|-----------|----|----------|----------|-------|-------|------|-----------|
| <i>DHCR7</i>     | 0.13<br>b  | 0.08<br>b  | 0.09<br>bc | 0.00<br>bc | 0.21<br>bc  | 0.73<br>a | 0.14<br>b   | 0.41<br>c | 11 | 71428193 | 71452868 | 0.01  | NA    | 0.04 | 5.83E-43  |
| <i>NADSYN1</i>   | 0.09<br>b  | 0.13<br>b  | 0.06<br>b  | 0.08<br>b  | 0.03<br>b   | 1.67<br>a | 0.09<br>b   | 1.25<br>c | 11 | 71453109 | 71524107 | 0.05  | -0.19 | 0.04 | 1.60E-233 |
| <i>KRTAP5-7</i>  | 0.01<br>b  | 0.04<br>b  | 0.04<br>b  | 0.08<br>ab | 0.10<br>b   | 0.59<br>a | 0.02<br>b   | 0.13<br>b | 11 | 71527267 | 71528674 | 0.03  | NA    | 0.04 | 2.17E-20  |
| <i>KRTAP5-8</i>  | 0.06<br>b  | 0.03<br>b  | 0.03<br>b  | 0.07<br>ab | 0.02<br>ab  | 0.50<br>a | 0.01<br>b   | 0.03<br>b | 11 | 71538025 | 71539207 | 0.00  | NA    | 0.04 | 4.14E-14  |
| <i>KRTAP5-9</i>  | 0.09<br>b  | 0.04<br>b  | 0.01<br>b  | 0.06<br>ab | 0.09<br>b   | 0.45<br>a | 0.05<br>b   | 0.22<br>b | 11 | 71548418 | 71549553 | -0.03 | NA    | 0.04 | 4.90E-12  |
| <i>KRTAP5-10</i> | 0.01<br>b  | 0.04<br>b  | 0.01<br>b  | 0.10<br>b  | 0.05<br>b   | 0.44<br>a | 0.06<br>b   | 0.26<br>b | 11 | 71565563 | 71566738 | -0.04 | NA    | 0.04 | 1.00E-11  |
| <i>FAM86C1</i>   | 0.02<br>b  | 0.04<br>b  | 0.07<br>b  | 0.15<br>b  | 0.25<br>bc  | 0.93<br>a | 0.07<br>b   | 0.75<br>c | 11 | 71787510 | 71801236 | 0.02  | NA    | 0.03 | 3.71E-70  |
| <i>RNF121</i>    | 0.05<br>b  | 0.03<br>b  | 0.03<br>b  | 0.18<br>b  | 0.22<br>bc  | 0.79<br>a | 0.02<br>b   | 0.94<br>c | 11 | 71928701 | 71997597 | -0.01 | NA    | 0.03 | 6.34E-60  |
| <i>NUMA1</i>     | 0.11<br>b  | 0.14<br>b  | 0.02<br>b  | 0.01<br>b  | 0.45<br>b   | 1.55<br>a | 0.10<br>b   | 1.71<br>c | 11 | 72002864 | 72080693 | 0.00  | -0.11 | 0.03 | 1.49E-246 |
| <i>LRTOMT</i>    | 0.12<br>b  | 0.08<br>b  | 0.02<br>b  | 0.02<br>b  | 0.40<br>bc  | 0.61<br>a | 0.11<br>b   | 0.81<br>c | 11 | 72080331 | 72110782 | 0.01  | NA    | 0.03 | 4.42E-40  |
| <i>LAMTOR1</i>   | 0.10<br>b  | 0.06<br>b  | 0.01<br>b  | 0.08<br>b  | 0.36<br>bc  | 0.75<br>a | 0.01<br>b   | 0.94<br>c | 11 | 72085895 | 72103387 | 0.05  | NA    | 0.03 | 1.23E-56  |
| <i>ANAPC15</i>   | 0.11<br>b  | 0.03<br>b  | 0.02<br>b  | 0.02<br>b  | 0.19<br>bc  | 0.46<br>a | 0.13<br>b   | 0.72<br>c | 11 | 72106378 | 72112780 | 0.00  | NA    | 0.03 | 3.16E-25  |
| <i>INPL1</i>     | 0.16<br>b  | 0.06<br>b  | 0.05<br>b  | 0.01<br>b  | 0.13<br>bc  | 0.76<br>a | 0.01<br>b   | 0.75<br>c | 11 | 72223701 | 72239105 | 0.00  | NA    | 0.03 | 5.98E-51  |
| <i>CLPB</i>      | 0.10<br>bc | 0.14<br>b  | 0.10<br>cd | 0.14<br>bc | 0.01<br>bcd | 0.74<br>a | 0.09<br>bc  | 0.57<br>d | 11 | 72292425 | 72434680 | -0.04 | NA    | 0.03 | 2.31E-50  |
| <i>ARAP1</i>     | 0.08<br>bc | 0.06<br>bc | 0.01<br>b  | 0.11<br>bc | 0.04<br>bc  | 0.59<br>a | 0.15<br>bc  | 0.78<br>c | 11 | 72685069 | 72793599 | 0.05  | NA    | 0.03 | 7.45E-36  |
| <i>STARD10</i>   | 0.03<br>b  | 0.05<br>b  | 0.01<br>b  | 0.09<br>bc | 0.23<br>bc  | 0.66<br>a | 0.09<br>bc  | 0.67<br>c | 11 | 72754729 | 72794168 | 0.07  | NA    | 0.03 | 8.25E-37  |
| <i>ATG16L2</i>   | 0.06<br>b  | 0.03<br>b  | 0.02<br>b  | 0.01<br>b  | 0.11<br>ab  | 0.34<br>a | 0.28<br>b   | 0.52<br>b | 11 | 72814308 | 72843674 | 0.00  | NA    | 0.03 | 1.68E-15  |
| <i>FCHSD2</i>    | 0.14<br>bc | 0.08<br>b  | 0.03<br>b  | 0.02<br>b  | 0.09<br>bc  | 0.48<br>a | 0.17<br>bc  | 0.72<br>c | 11 | 72836745 | 73142261 | 0.13  | NA    | 0.03 | 3.54E-28  |
| <i>ARHGEF17</i>  | 0.16<br>bc | 0.10<br>bc | 0.05<br>ab | 0.11<br>bc | 0.14<br>bc  | 0.31<br>a | 0.08<br>abc | 0.48<br>c | 11 | 73308289 | 73369091 | 0.06  | NA    | 0.03 | 4.06E-15  |
| <i>RELT</i>      | 0.03<br>b  | 0.05<br>b  | 0.05<br>b  | 0.11<br>ab | 0.10<br>ab  | 0.41<br>a | 0.01<br>b   | 0.25<br>b | 11 | 73376264 | 73397474 | 0.08  | NA    | 0.03 | 1.60E-11  |
| <i>RAB6A</i>     | 0.07<br>b  | 0.00<br>b  | 0.06<br>b  | 0.15<br>b  | 0.30<br>bc  | 0.73<br>a | 0.14<br>b   | 0.68<br>c | 11 | 73675638 | 73761137 | -0.09 | NA    | 0.03 | 5.61E-46  |
| <i>MRPL48</i>    | 0.06<br>b  | 0.06<br>b  | 0.05<br>b  | 0.04<br>b  | 0.18<br>bc  | 0.55<br>a | 0.16<br>ab  | 0.78<br>c | 11 | 73787316 | 73865133 | 0.00  | NA    | 0.03 | 5.02E-35  |
| <i>COA4</i>      | 0.07<br>b  | 0.03<br>b  | 0.05<br>b  | 0.03<br>b  | 0.24<br>bc  | 0.68<br>a | 0.11<br>b   | 0.94<br>c | 11 | 73872667 | 73876988 | 0.00  | NA    | 0.03 | 9.29E-51  |

|               |            |            |            |             |            |           |            |           |    |          |          |       |       |      |           |
|---------------|------------|------------|------------|-------------|------------|-----------|------------|-----------|----|----------|----------|-------|-------|------|-----------|
| <i>PAAF1</i>  | 0.01<br>b  | 0.07<br>b  | 0.03<br>b  | 0.08<br>b   | 0.16<br>bc | 0.54<br>a | 0.00<br>b  | 0.89<br>c | 11 | 73876699 | 73931124 | 0.04  | NA    | 0.03 | 3.25E-36  |
| <i>UCP3</i>   | 0.16<br>b  | 0.00<br>ab | 0.01<br>ab | 0.03<br>ab  | 0.15<br>ab | 0.30<br>a | 0.01<br>ab | 0.46<br>b | 11 | 74000281 | 74009435 | 0.06  | NA    | 0.03 | 8.15E-11  |
| <i>C2CD3</i>  | 0.07<br>b  | 0.02<br>b  | 0.04<br>b  | 0.15<br>b   | 0.32<br>bc | 0.74<br>a | 0.14<br>b  | 0.69<br>c | 11 | 74012714 | 74171210 | 0.00  | NA    | 0.03 | 8.74E-47  |
| <i>PPME1</i>  | 0.07<br>b  | 0.05<br>b  | 0.09<br>b  | 0.12<br>b   | 0.25<br>bc | 0.88<br>a | 0.19<br>b  | 0.66<br>c | 11 | 74171099 | 74254703 | 0.05  | NA    | 0.03 | 4.14E-64  |
| <i>LIPT2</i>  | 0.02<br>b  | 0.03<br>b  | 0.04<br>b  | 0.01<br>b   | 0.45<br>bc | 0.52<br>a | 0.21<br>ab | 0.65<br>c | 11 | 74491712 | 74493733 | -0.09 | NA    | 0.03 | 1.00E-28  |
| <i>POLD3</i>  | 0.03<br>b  | 0.02<br>b  | 0.06<br>b  | 0.32<br>ab  | 0.12<br>bc | 0.56<br>a | 0.22<br>ab | 0.56<br>c | 11 | 74493851 | 74669117 | 0.14  | NA    | 0.03 | 5.18E-31  |
| <i>RNF169</i> | 0.06<br>bc | 0.05<br>bc | 0.03<br>bc | 0.25<br>ab  | 0.26<br>bc | 0.63<br>a | 0.11<br>b  | 0.46<br>c | 11 | 74748868 | 74842413 | 0.01  | NA    | 0.03 | 1.43E-30  |
| <i>XRRA1</i>  | 0.01<br>b  | 0.08<br>b  | 0.00<br>b  | 0.01<br>b   | 0.42<br>bc | 0.66<br>a | 0.05<br>b  | 0.91<br>c | 11 | 74807739 | 74949200 | 0.05  | NA    | 0.03 | 3.25E-47  |
| <i>SPCS2</i>  | 0.04<br>b  | 0.01<br>b  | 0.01<br>b  | 0.02<br>b   | 0.24<br>bc | 0.55<br>a | 0.06<br>b  | 1.04<br>c | 11 | 74949247 | 74979031 | 0.00  | NA    | 0.03 | 4.36E-44  |
| <i>NEU3</i>   | 0.01<br>b  | 0.02<br>b  | 0.02<br>b  | 0.04<br>ab  | 0.20<br>b  | 0.45<br>a | 0.03<br>ab | 0.43<br>b | 11 | 74988134 | 75018893 | 0.10  | NA    | 0.03 | 4.20E-15  |
| <i>ARRB1</i>  | 0.08<br>b  | 0.06<br>b  | 0.02<br>b  | 0.11<br>b   | 0.42<br>b  | 1.31<br>a | 0.02<br>b  | 1.77<br>c | 11 | 75264182 | 75351705 | NA    | -0.03 | 0.03 | 9.70E-200 |
| <i>RPS3</i>   | 0.05<br>b  | 0.03<br>b  | 0.02<br>b  | 0.08<br>b   | 0.39<br>bc | 0.41<br>a | 0.05<br>b  | 0.91<br>c | 11 | 75399486 | 75422280 | 0.06  | NA    | 0.03 | 3.08E-30  |
| <i>UVRAG</i>  | 0.10<br>b  | 0.02<br>b  | 0.04<br>b  | 0.24<br>ab  | 0.48<br>bc | 0.69<br>a | 0.11<br>b  | 0.72<br>c | 11 | 75815167 | 76143195 | 0.09  | NA    | 0.03 | 1.14E-44  |
| <i>THAP12</i> | 0.01<br>b  | 0.02<br>b  | 0.02<br>b  | 0.04<br>b   | 0.44<br>bc | 0.60<br>a | 0.13<br>b  | 0.83<br>c | 11 | 76349956 | 76380971 | 0.02  | NA    | 0.02 | 4.51E-39  |
| <i>EMSY</i>   | 0.06<br>bc | 0.07<br>bc | 0.03<br>b  | 0.15<br>b   | 0.31<br>bc | 0.69<br>a | 0.08<br>b  | 0.53<br>c | 11 | 76444923 | 76553025 | 0.02  | NA    | 0.03 | 4.76E-36  |
| <i>LRRC32</i> | 0.06<br>b  | 0.05<br>b  | 0.04<br>b  | 0.05<br>b   | 0.45<br>b  | 1.34<br>a | 0.03<br>b  | 1.51<br>c | 11 | 76657524 | 76670747 | NA    | -0.06 | 0.03 | 4.02E-180 |
| <i>TSKU</i>   | 0.11<br>bc | 0.12<br>bc | 0.02<br>bc | 0.02<br>abc | 0.06<br>bc | 0.46<br>a | 0.09<br>ab | 0.53<br>c | 11 | 76782251 | 76798154 | 0.08  | NA    | 0.03 | 6.54E-21  |
| <i>ACER3</i>  | 0.06<br>bc | 0.00<br>b  | 0.04<br>b  | 0.14<br>b   | 0.15<br>bc | 0.66<br>a | 0.11<br>b  | 0.55<br>c | 11 | 76860867 | 77026797 | 0.03  | NA    | 0.03 | 8.76E-34  |
| <i>MYO7A</i>  | 0.05<br>b  | 0.05<br>b  | 0.05<br>b  | 0.03<br>b   | 0.39<br>b  | 1.44<br>a | 0.03<br>b  | 1.40<br>c | 11 | 77128264 | 77215239 | NA    | -0.07 | 0.03 | 3.28E-189 |
| <i>PAK1</i>   | 0.00<br>b  | 0.02<br>b  | 0.04<br>b  | 0.13<br>b   | 0.55<br>c  | 0.70<br>a | 0.06<br>b  | 0.55<br>c | 11 | 77321707 | 77474635 | 0.03  | NA    | 0.03 | 2.36E-38  |
| <i>CLNSIA</i> | 0.08<br>b  | 0.04<br>b  | 0.08<br>b  | 0.14<br>b   | 0.42<br>bc | 0.82<br>a | 0.14<br>b  | 0.76<br>c | 11 | 77514936 | 77637805 | 0.03  | NA    | 0.03 | 7.70E-61  |
| <i>AQP11</i>  | 0.01<br>b  | 0.03<br>b  | 0.00<br>b  | 0.16<br>b   | 0.36<br>b  | 0.40<br>a | 0.02<br>b  | 0.45<br>b | 11 | 77589391 | 77610355 | 0.01  | NA    | 0.03 | 7.05E-14  |
| <i>RSF1</i>   | 0.05<br>b  | 0.06<br>b  | 0.05<br>b  | 0.02<br>b   | 0.43<br>b  | 1.40<br>a | 0.02<br>b  | 1.26<br>c | 11 | 77659996 | 77821017 | 0.01  | 0.26  | 0.03 | 1.19E-171 |

|                 |                 |                 |                 |                  |                 |                 |                  |                 |    |          |          |       |       |      |           |
|-----------------|-----------------|-----------------|-----------------|------------------|-----------------|-----------------|------------------|-----------------|----|----------|----------|-------|-------|------|-----------|
| <i>AAMDC</i>    | -<br>0.06<br>b  | -<br>0.03<br>b  | -<br>0.00<br>b  | -<br>0.07<br>bc  | -<br>0.27<br>bc | -<br>0.51<br>a  | -<br>0.07<br>bc  | -<br>0.68<br>c  | 11 | 77821109 | 77918432 | -0.08 | NA    | 0.03 | 5.25E-26  |
| <i>INTS4</i>    | -<br>0.05<br>b  | -<br>0.01<br>b  | -<br>0.05<br>b  | -<br>0.14<br>b   | -<br>0.36<br>bc | -<br>0.99<br>a  | -<br>0.06<br>b   | -<br>0.85<br>c  | 11 | 77878720 | 77994678 | 0.00  | NA    | 0.03 | 1.20E-79  |
| <i>NDUFC2</i>   | -<br>0.03<br>b  | -<br>0.05<br>b  | -<br>0.04<br>b  | -<br>0.07<br>b   | -<br>0.33<br>bc | -<br>0.87<br>a  | -<br>0.01<br>b   | -<br>0.83<br>c  | 11 | 78068304 | 78080219 | 0.00  | NA    | 0.03 | 5.68E-64  |
| <i>ALG8</i>     | -<br>0.06<br>b  | -<br>0.07<br>b  | -<br>0.09<br>b  | -<br>0.02<br>b   | -<br>0.24<br>bc | -<br>1.05<br>a  | -<br>0.05<br>b   | -<br>0.84<br>c  | 11 | 78100936 | 78139660 | 0.07  | NA    | 0.03 | 1.48E-91  |
| <i>KCTD21</i>   | -<br>0.04<br>b  | -<br>0.08<br>b  | -<br>0.03<br>b  | -<br>0.07<br>b   | -<br>0.20<br>bc | -<br>0.80<br>a  | -<br>0.03<br>b   | -<br>0.74<br>c  | 11 | 78171249 | 78188822 | -0.05 | NA    | 0.03 | 2.07E-52  |
| <i>USP35</i>    | -<br>0.03<br>b  | -<br>0.04<br>b  | -<br>0.05<br>b  | -<br>0.11<br>b   | -<br>0.31<br>b  | -<br>1.34<br>a  | -<br>0.07<br>b   | -<br>1.33<br>c  | 11 | 78188812 | 78214711 | 0.04  | -0.07 | 0.03 | 1.49E-165 |
| <i>NARS2</i>    | -<br>0.04<br>b  | -<br>0.02<br>b  | -<br>0.03<br>b  | -<br>0.09<br>ab  | -<br>0.48<br>bc | -<br>0.60<br>a  | -<br>0.04<br>b   | -<br>0.75<br>c  | 11 | 78435961 | 78574874 | -0.08 | NA    | 0.03 | 4.23E-36  |
| <i>CCDC77</i>   | -<br>0.11<br>a  | -<br>0.03<br>a  | -<br>0.05<br>a  | -<br>0.34<br>a   | -<br>0.24<br>a  | -<br>0.01<br>a  | -<br>0.10<br>a   | -<br>0.22<br>a  | 12 | 389273   | 442645   | 0.08  | NA    | 0.03 | 1.02E-05  |
| <i>WNKI</i>     | -<br>0.09<br>ab | -<br>0.01<br>ab | -<br>0.05<br>b  | -<br>0.15<br>ab  | -<br>0.34<br>b  | -<br>0.28<br>a  | -<br>0.08<br>ab  | -<br>0.11<br>ab | 12 | 752593   | 911452   | 0.07  | NA    | 0.03 | 1.27E-06  |
| <i>ADIPOR2</i>  | -<br>0.12<br>ab | -<br>0.00<br>ab | -<br>0.06<br>b  | -<br>0.24<br>ab  | -<br>0.40<br>b  | -<br>0.31<br>a  | -<br>0.12<br>ab  | -<br>0.14<br>ab | 12 | 1688574  | 1788678  | 0.00  | NA    | 0.03 | 8.02E-11  |
| <i>DCP1B</i>    | -<br>0.10<br>a  | -<br>0.03<br>a  | -<br>0.05<br>a  | -<br>0.00<br>a   | -<br>0.64<br>a  | -<br>0.08<br>a  | -<br>0.14<br>a   | -<br>0.08<br>a  | 12 | 1946054  | 2004535  | 0.06  | NA    | 0.03 | 1.78E-05  |
| <i>FKBP4</i>    | -<br>0.21<br>ab | -<br>0.01<br>bc | -<br>0.08<br>c  | -<br>0.14<br>abc | -<br>0.38<br>c  | -<br>0.38<br>a  | -<br>0.12<br>abc | -<br>0.37<br>ab | 12 | 2794953  | 2805423  | 0.01  | NA    | 0.03 | 3.77E-20  |
| <i>RHNO1</i>    | -<br>0.22<br>a  | -<br>0.02<br>ab | -<br>0.07<br>ab | -<br>0.24<br>a   | -<br>0.46<br>ab | -<br>0.21<br>ab | -<br>0.13<br>ab  | -<br>0.05<br>ab | 12 | 2876258  | 2889523  | 0.02  | NA    | 0.03 | 4.58E-11  |
| <i>TULP3</i>    | -<br>0.14<br>a  | -<br>0.01<br>a  | -<br>0.05<br>a  | -<br>0.30<br>a   | -<br>0.26<br>a  | -<br>0.15<br>a  | -<br>0.10<br>a   | -<br>0.05<br>a  | 12 | 2877223  | 2941140  | 0.00  | NA    | 0.03 | 4.54E-06  |
| <i>TSPAN9</i>   | -<br>0.08<br>a  | -<br>0.10<br>a  | -<br>0.06<br>a  | -<br>0.07<br>a   | -<br>0.36<br>a  | -<br>0.01<br>a  | -<br>0.28<br>a   | -<br>0.06<br>a  | 12 | 3077355  | 3286564  | -0.06 | NA    | 0.03 | 4.44E-07  |
| <i>PARP11</i>   | -<br>0.09<br>a  | -<br>0.06<br>a  | -<br>0.05<br>a  | -<br>0.19<br>a   | -<br>0.68<br>a  | -<br>0.02<br>a  | -<br>0.14<br>a   | -<br>0.11<br>a  | 12 | 3791047  | 3873448  | 0.07  | NA    | 0.03 | 1.08E-06  |
| <i>CCND2</i>    | -<br>0.09<br>ab | -<br>0.00<br>a  | -<br>0.08<br>a  | -<br>0.31<br>ab  | -<br>0.28<br>ab | -<br>0.38<br>b  | -<br>0.22<br>ab  | -<br>0.20<br>ab | 12 | 4273772  | 4305350  | -0.05 | NA    | 0.03 | 5.54E-17  |
| <i>RAD51API</i> | -<br>0.25<br>ab | -<br>0.13<br>ab | -<br>0.13<br>b  | -<br>0.41<br>a   | -<br>0.08<br>ab | -<br>0.25<br>ab | -<br>0.24<br>ab  | -<br>0.26<br>ab | 12 | 4538798  | 4560048  | 0.01  | NA    | 0.03 | 1.09E-27  |
| <i>DYRK4</i>    | -<br>0.16<br>a  | -<br>0.03<br>a  | -<br>0.06<br>a  | -<br>0.16<br>a   | -<br>0.48<br>a  | -<br>0.10<br>a  | -<br>0.15<br>a   | -<br>0.19<br>a  | 12 | 4562204  | 4615302  | 0.07  | NA    | 0.03 | 8.96E-08  |
| <i>AKAP3</i>    | -<br>0.15<br>ab | -<br>0.11<br>ab | -<br>0.09<br>a  | -<br>0.20<br>ab  | -<br>0.34<br>b  | -<br>0.24<br>b  | -<br>0.10<br>ab  | -<br>0.01<br>ab | 12 | 4615508  | 4649047  | 0.01  | NA    | 0.03 | 4.76E-12  |
| <i>TNFRSF1A</i> | -<br>0.02<br>a  | -<br>0.02<br>a  | -<br>0.00<br>a  | -<br>0.03<br>a   | -<br>0.86<br>b  | -<br>0.22<br>a  | -<br>0.05<br>ab  | -<br>0.06<br>a  | 12 | 6328757  | 6342114  | 0.04  | -0.12 | 0.03 | 2.66E-07  |
| <i>LTBR</i>     | -<br>0.14<br>a  | -<br>0.07<br>a  | -<br>0.06<br>a  | -<br>0.25<br>a   | -<br>0.25<br>a  | -<br>0.21<br>a  | -<br>0.08<br>a   | -<br>0.02<br>a  | 12 | 6375045  | 6391571  | 0.04  | NA    | 0.03 | 6.41E-08  |
| <i>NCAPD2</i>   | -<br>0.11<br>ab | -<br>0.10<br>ab | -<br>0.10<br>ab | -<br>0.35<br>a   | -<br>0.16<br>ab | -<br>0.24<br>a  | -<br>0.24<br>a   | -<br>0.24<br>a  | 12 | 6493356  | 6531955  | 0.03  | NA    | 0.03 | 1.92E-16  |

|                  |            |            |            |            |            |            |            |            |    |          |          |       |      |      |          |
|------------------|------------|------------|------------|------------|------------|------------|------------|------------|----|----------|----------|-------|------|------|----------|
| <i>GAPDH</i>     | 0.16<br>a  | 0.11<br>a  | 0.07<br>a  | 0.20<br>a  | 0.14<br>a  | 0.07<br>a  | 0.08<br>a  | 0.24<br>a  | 12 | 6533927  | 6538374  | 0.01  | NA   | 0.03 | 1.14E-08 |
| <i>NOP2</i>      | 0.15<br>ab | 0.13<br>ab | 0.09<br>b  | 0.17<br>ab | 0.19<br>b  | 0.24<br>a  | 0.19<br>ab | 0.12<br>ab | 12 | 6556863  | 6568691  | -0.09 | NA   | 0.03 | 1.03E-13 |
| <i>ING4</i>      | 0.04<br>a  | 0.06<br>a  | 0.04<br>a  | 0.25<br>a  | 0.52<br>a  | 0.18<br>a  | 0.02<br>a  | 0.04<br>a  | 12 | 6650280  | 6663148  | 0.02  | NA   | 0.03 | 2.19E-05 |
| <i>ZNF384</i>    | 0.01<br>a  | 0.05<br>a  | 0.05<br>a  | 0.22<br>a  | 0.46<br>a  | 0.25<br>a  | 0.14<br>a  | 0.02<br>a  | 12 | 6666477  | 6689572  | 0.06  | NA   | 0.03 | 3.32E-07 |
| <i>COPS7A</i>    | 0.00<br>a  | 0.04<br>a  | 0.04<br>a  | 0.21<br>a  | 0.52<br>a  | 0.17<br>a  | 0.06<br>a  | 0.22<br>a  | 12 | 6723741  | 6731875  | 0.06  | NA   | 0.03 | 7.81E-06 |
| <i>MLF2</i>      | 0.09<br>a  | 0.02<br>a  | 0.04<br>a  | 0.06<br>a  | 0.45<br>a  | 0.23<br>a  | 0.10<br>a  | 0.10<br>a  | 12 | 6747996  | 6767475  | 0.03  | NA   | 0.03 | 9.65E-06 |
| <i>CDCA3</i>     | 0.27<br>a  | 0.17<br>ab | 0.14<br>b  | 0.31<br>a  | 0.23<br>ab | 0.27<br>a  | 0.25<br>a  | 0.31<br>a  | 12 | 6844793  | 6852066  | -0.04 | NA   | 0.03 | 1.25E-33 |
| <i>USP5</i>      | 0.06<br>a  | 0.09<br>a  | 0.06<br>a  | 0.17<br>a  | 0.36<br>a  | 0.15<br>a  | 0.13<br>a  | 0.27<br>a  | 12 | 6852128  | 6866632  | -0.03 | NA   | 0.03 | 9.67E-08 |
| <i>TPH1</i>      | 0.17<br>a  | 0.13<br>a  | 0.08<br>ab | 0.25<br>a  | 0.23<br>ab | 0.00<br>ab | 0.12<br>ab | 0.25<br>a  | 12 | 6867119  | 6870948  | 0.03  | NA   | 0.03 | 1.25E-10 |
| <i>ATN1</i>      | 0.03<br>a  | 0.03<br>a  | 0.02<br>a  | 0.08<br>a  | 0.53<br>a  | 0.25<br>a  | 0.04<br>a  | 0.10<br>a  | 12 | 6924463  | 6942321  | 0.01  | NA   | 0.03 | 3.65E-05 |
| <i>C12orf57</i>  | 0.31<br>b  | 0.22<br>b  | 0.11<br>a  | 0.12<br>ab | 0.56<br>b  | 0.02<br>ab | 0.09<br>ab | 0.07<br>ab | 12 | 6942978  | 6946003  | 0.03  | NA   | 0.03 | 4.00E-24 |
| <i>SCARNA12</i>  | 0.14<br>a  | 0.12<br>a  | 0.07<br>a  | 0.18<br>a  | 0.13<br>a  | 0.15<br>a  | 0.06<br>a  | 0.01<br>a  | 12 | 6967337  | 6967606  | 0.01  | NA   | 0.03 | 1.25E-07 |
| <i>EMG1</i>      | 0.18<br>a  | 0.11<br>a  | 0.06<br>a  | 0.09<br>a  | 0.19<br>a  | 0.08<br>a  | 0.08<br>a  | 0.01<br>a  | 12 | 6970893  | 6979941  | 0.03  | NA   | 0.03 | 1.05E-06 |
| <i>LPCAT3</i>    | 0.07<br>b  | 0.05<br>ab | 0.04<br>b  | 0.13<br>ab | 0.37<br>b  | 0.31<br>a  | 0.12<br>ab | 0.03<br>ab | 12 | 6976186  | 7018510  | 0.01  | NA   | 0.03 | 1.34E-07 |
| <i>NECAP1</i>    | 0.11<br>ab | 0.05<br>ab | 0.01<br>ab | 0.00<br>ab | 0.67<br>b  | 0.16<br>a  | 0.02<br>ab | 0.11<br>ab | 12 | 8076939  | 8097859  | 0.00  | NA   | 0.03 | 2.30E-05 |
| <i>CLEC4A</i>    | 0.01<br>ab | 0.01<br>ab | 0.01<br>ab | 0.03<br>ab | 0.79<br>b  | 0.21<br>a  | 0.04<br>ab | 0.07<br>ab | 12 | 8123632  | 8138607  | NA    | 0.05 | 0.03 | 4.06E-06 |
| <i>DDX12P</i>    | 0.17<br>a  | 0.09<br>ab | 0.10<br>ab | 0.33<br>a  | 0.10<br>ab | 0.26<br>a  | 0.13<br>ab | 0.14<br>ab | 12 | 9418673  | 9448229  | 0.02  | NA   | 0.03 | 4.89E-15 |
| <i>GABARAPL1</i> | 0.11<br>a  | 0.08<br>a  | 0.05<br>a  | 0.02<br>a  | 0.65<br>a  | 0.13<br>a  | 0.11<br>a  | 0.00<br>a  | 12 | 10212458 | 10223130 | 0.02  | NA   | 0.03 | 1.48E-06 |
| <i>MAGOHB</i>    | 0.19<br>a  | 0.16<br>a  | 0.10<br>ab | 0.12<br>ab | 0.16<br>ab | 0.20<br>a  | 0.06<br>ab | 0.26<br>a  | 12 | 10604190 | 10613623 | 0.01  | NA   | 0.03 | 1.96E-15 |
| <i>LOH12CR2</i>  | 0.13<br>a  | 0.03<br>a  | 0.05<br>a  | 0.13<br>a  | 0.59<br>a  | 0.12<br>a  | 0.03<br>a  | 0.22<br>a  | 12 | 12355406 | 12357067 | 0.02  | NA   | 0.03 | 1.54E-06 |
| <i>BORCS5</i>    | 0.01<br>a  | 0.04<br>a  | 0.04<br>a  | 0.21<br>a  | 0.61<br>a  | 0.13<br>a  | 0.16<br>a  | 0.20<br>a  | 12 | 12357079 | 12469694 | 0.07  | NA   | 0.03 | 2.00E-06 |
| <i>CREBL2</i>    | 0.10<br>a  | 0.11<br>a  | 0.06<br>a  | 0.06<br>a  | 0.70<br>a  | 0.08<br>a  | 0.12<br>a  | 0.17<br>a  | 12 | 12611827 | 12645108 | 0.00  | NA   | 0.03 | 1.86E-08 |
| <i>GPR19</i>     | 0.14<br>ab | 0.14<br>ab | 0.11<br>b  | 0.13<br>ab | 0.21<br>ab | 0.23<br>a  | 0.21<br>ab | 0.37<br>a  | 12 | 12660891 | 12696207 | -0.06 | NA   | 0.03 | 5.50E-19 |

|                |                 |                 |                 |                 |                 |                 |                 |                 |    |           |           |       |       |      |          |
|----------------|-----------------|-----------------|-----------------|-----------------|-----------------|-----------------|-----------------|-----------------|----|-----------|-----------|-------|-------|------|----------|
| <i>DDX47</i>   | 0.05<br>a       | 0.02<br>a       | -<br>0.04<br>a  | 0.22<br>a       | -<br>0.54<br>a  | 0.12<br>a       | 0.20<br>a       | 0.16<br>a       | 12 | 12813316  | 12829981  | -0.01 | NA    | 0.03 | 3.30E-06 |
| <i>FAM234B</i> | -<br>0.04<br>b  | -<br>0.01<br>b  | -<br>0.05<br>b  | -<br>0.12<br>ab | -<br>0.11<br>b  | -<br>0.41<br>a  | -<br>0.07<br>ab | -<br>0.13<br>ab | 12 | 13044284  | 13142521  | 0.04  | NA    | 0.03 | 2.99E-10 |
| <i>WBPI1</i>   | 0.12<br>ab      | 0.01<br>ab      | -<br>0.05<br>ab | -<br>0.15<br>ab | -<br>0.60<br>b  | -<br>0.23<br>a  | -<br>0.10<br>ab | -<br>0.19<br>ab | 12 | 14784579  | 14803540  | 0.02  | NA    | 0.03 | 1.13E-08 |
| <i>STRAP</i>   | 0.15<br>a       | 0.08<br>a       | -<br>0.06<br>a  | -<br>0.15<br>a  | -<br>0.51<br>a  | -<br>0.10<br>a  | -<br>0.17<br>a  | -<br>0.17<br>a  | 12 | 15882391  | 15903478  | 0.04  | NA    | 0.03 | 1.35E-08 |
| <i>DERA</i>    | 0.01<br>a       | 0.05<br>a       | -<br>0.03<br>a  | -<br>0.37<br>a  | -<br>0.29<br>a  | -<br>0.04<br>a  | -<br>0.22<br>a  | -<br>0.01<br>a  | 12 | 15911172  | 16037282  | 0.07  | NA    | 0.03 | 2.47E-05 |
| <i>RECQL</i>   | 0.11<br>a       | 0.04<br>a       | -<br>0.05<br>a  | -<br>0.30<br>a  | -<br>0.18<br>a  | -<br>0.09<br>a  | -<br>0.15<br>a  | -<br>0.12<br>a  | 12 | 21468911  | 21501669  | 0.02  | NA    | 0.02 | 1.33E-05 |
| <i>GOLT1B</i>  | 0.18<br>a       | 0.04<br>ab      | -<br>0.07<br>ab | -<br>0.32<br>a  | -<br>0.16<br>ab | -<br>0.13<br>ab | -<br>0.18<br>ab | -<br>0.14<br>ab | 12 | 21501781  | 21518408  | 0.03  | NA    | 0.02 | 6.73E-10 |
| <i>CMAS</i>    | 0.27<br>a       | 0.06<br>ab      | -<br>0.07<br>b  | -<br>0.23<br>ab | -<br>0.45<br>b  | -<br>0.03<br>ab | -<br>0.07<br>ab | -<br>0.19<br>ab | 12 | 22046174  | 22065674  | 0.01  | NA    | 0.02 | 1.98E-11 |
| <i>ETFRF1</i>  | -<br>0.09<br>a  | -<br>0.10<br>a  | -<br>0.07<br>a  | -<br>0.17<br>a  | -<br>0.55<br>a  | -<br>0.12<br>a  | -<br>0.20<br>a  | -<br>0.12<br>a  | 12 | 25195216  | 25209645  | 0.02  | NA    | 0.02 | 6.68E-09 |
| <i>KRAS</i>    | 0.12<br>a       | 0.02<br>a       | -<br>0.06<br>a  | -<br>0.31<br>a  | -<br>0.26<br>a  | -<br>0.15<br>a  | -<br>0.21<br>a  | -<br>0.15<br>a  | 12 | 25204789  | 25250936  | 0.08  | NA    | 0.02 | 3.64E-08 |
| <i>INTS13</i>  | 0.12<br>a       | 0.12<br>a       | -<br>0.07<br>a  | -<br>0.31<br>a  | -<br>0.21<br>a  | -<br>0.01<br>a  | -<br>0.18<br>a  | -<br>0.06<br>a  | 12 | 26905181  | 26938326  | 0.00  | NA    | 0.02 | 3.16E-08 |
| <i>MED21</i>   | 0.04<br>a       | 0.02<br>a       | -<br>0.03<br>a  | -<br>0.36<br>a  | -<br>0.51<br>a  | -<br>0.05<br>a  | -<br>0.13<br>a  | -<br>0.07<br>a  | 12 | 27022546  | 27066343  | 0.03  | NA    | 0.02 | 2.47E-05 |
| <i>DDX11</i>   | 0.08<br>a       | 0.09<br>a       | -<br>0.07<br>a  | -<br>0.36<br>a  | -<br>0.15<br>a  | -<br>0.17<br>a  | -<br>0.11<br>a  | -<br>0.17<br>a  | 12 | 31073845  | 31104791  | 0.04  | NA    | 0.02 | 2.73E-09 |
| <i>H3F3C</i>   | 0.09<br>ab      | 0.00<br>ab      | -<br>0.03<br>ab | -<br>0.07<br>ab | -<br>0.71<br>b  | -<br>0.20<br>a  | -<br>0.04<br>ab | -<br>0.05<br>ab | 12 | 31791185  | 31792241  | NA    | 0.04  | 0.02 | 4.35E-06 |
| <i>DNM1L</i>   | 0.13<br>a       | 0.03<br>a       | -<br>0.07<br>a  | -<br>0.38<br>a  | -<br>0.34<br>a  | -<br>0.19<br>a  | -<br>0.16<br>a  | -<br>0.11<br>a  | 12 | 32679200  | 32745650  | 0.04  | NA    | 0.02 | 3.68E-10 |
| <i>YARS2</i>   | 0.16<br>a       | 0.09<br>a       | -<br>0.06<br>a  | -<br>0.27<br>a  | -<br>0.22<br>a  | -<br>0.05<br>a  | -<br>0.06<br>a  | -<br>0.07<br>a  | 12 | 32727490  | 32755902  | 0.02  | NA    | 0.02 | 2.30E-06 |
| <i>ALG10</i>   | 0.01<br>ab      | 0.02<br>ab      | -<br>0.05<br>ab | -<br>0.36<br>a  | -<br>0.25<br>ab | -<br>0.26<br>a  | -<br>0.16<br>ab | -<br>0.05<br>ab | 12 | 34022281  | 34029694  | 0.00  | NA    | 0.02 | 1.38E-08 |
| <i>HOXC13</i>  | 0.04<br>ab      | 0.22<br>ab      | -<br>0.14<br>b  | -<br>0.43<br>a  | -<br>0.38<br>ab | -<br>0.38<br>ab | -<br>0.17<br>ab | -<br>0.39<br>a  | 12 | 53938765  | 53946544  | 0.01  | NA    | NA   | 7.99E-37 |
| <i>HOXC11</i>  | -<br>0.05<br>ab | -<br>0.21<br>a  | -<br>0.10<br>ab | -<br>0.33<br>a  | -<br>0.14<br>ab | -<br>0.28<br>a  | -<br>0.19<br>ab | -<br>0.21<br>ab | 12 | 53973126  | 53977643  | 0.03  | NA    | NA   | 1.84E-21 |
| <i>HOXC8</i>   | -<br>0.03<br>ab | -<br>0.22<br>ab | -<br>0.10<br>b  | -<br>0.26<br>ab | -<br>0.06<br>ab | -<br>0.31<br>a  | -<br>0.06<br>ab | -<br>0.15<br>ab | 12 | 54009106  | 54012362  | 0.00  | NA    | NA   | 3.51E-19 |
| <i>GPR132</i>  | -<br>0.22<br>ab | -<br>0.09<br>ab | -<br>0.04<br>ab | -<br>0.19<br>a  | -<br>0.35<br>a  | -<br>0.18<br>a  | -<br>0.18<br>ab | -<br>0.17<br>ab | 14 | 105049389 | 105065445 | NA    | -0.01 | NA   | 4.84E-10 |
| <i>WASH3P</i>  | -<br>0.25<br>ab | -<br>0.22<br>a  | -<br>0.04<br>ab | -<br>0.24<br>a  | -<br>0.36<br>a  | -<br>0.02<br>ab | -<br>0.01<br>ab | -<br>0.07<br>ab | 15 | 101961603 | 101976543 | 0.02  | NA    | NA   | 4.07E-14 |
| <i>MYO1C</i>   | -<br>0.15<br>b  | -<br>0.12<br>ab | -<br>0.03<br>ab | -<br>0.06<br>ab | -<br>0.27<br>b  | -<br>0.26<br>a  | -<br>0.06<br>ab | -<br>0.04<br>ab | 17 | 1464098   | 1492812   | NA    | -0.07 | NA   | 9.07E-08 |

|                 |            |            |            |             |             |            |             |             |    |          |          |       |       |      |           |
|-----------------|------------|------------|------------|-------------|-------------|------------|-------------|-------------|----|----------|----------|-------|-------|------|-----------|
| <i>NTN1</i>     | 0.02<br>ab | 0.05<br>a  | 0.03<br>a  | 0.09<br>ab  | 0.24<br>ab  | 0.18<br>ab | 0.37<br>b   | 0.06<br>ab  | 17 | 9021542  | 9244000  | NA    | 0.02  | NA   | 1.54E-07  |
| <i>TRIM16L</i>  | 0.21<br>b  | 0.08<br>ab | 0.05<br>b  | 0.15<br>ab  | 0.26<br>ab  | 0.29<br>a  | 0.43<br>a   | 0.04<br>ab  | 17 | 18697998 | 18736118 | 0.02  | NA    | NA   | 1.67E-17  |
| <i>ANKRD13B</i> | 0.06<br>ab | 0.25<br>a  | 0.12<br>ab | 0.27<br>a   | 0.31<br>a   | 0.20<br>a  | 0.10<br>ab  | 0.27<br>a   | 17 | 29589769 | 29614761 | 0.04  | NA    | NA   | 3.07E-23  |
| <i>SPACA3</i>   | 0.38<br>b  | 0.01<br>ab | 0.02<br>ab | 0.12<br>ab  | 0.08<br>ab  | 0.18<br>a  | 0.12<br>a   | 0.05<br>ab  | 17 | 32970376 | 32997877 | 0.02  | NA    | NA   | 4.45E-13  |
| <i>SCARNA17</i> | 0.27<br>ab | 0.12<br>a  | 0.01<br>ab | 0.05<br>ab  | 0.14<br>a   | 0.03<br>ab | 0.04<br>ab  | 0.22<br>ab  | 18 | 49814133 | 49814276 | 0.02  | NA    | NA   | 6.98E-08  |
| <i>ABCA7</i>    | 0.02<br>ab | 0.19<br>a  | 0.08<br>ab | 0.21<br>a   | 0.15<br>ab  | 0.21<br>a  | 0.06<br>ab  | 0.00<br>ab  | 19 | 1040101  | 1065572  | NA    | -0.02 | NA   | 8.46E-12  |
| <i>EPSI5L1</i>  | 0.16<br>bc | 0.20<br>c  | 0.05<br>b  | 0.01<br>bc  | 0.47<br>c   | 0.35<br>a  | 0.02<br>bc  | 0.28<br>c   | 19 | 16355239 | 16472085 | NA    | -0.03 | NA   | 6.44E-19  |
| <i>CEACAM8</i>  | 0.32<br>ab | 0.02<br>ab | 0.01<br>ab | 0.09<br>ab  | 0.33<br>a   | 0.13<br>a  | 0.19<br>a   | 0.02<br>ab  | 19 | 42580241 | 42595055 | 0.01  | NA    | NA   | 5.35E-10  |
| <i>JOSD2</i>    | 0.01<br>b  | 0.00<br>b  | 0.04<br>b  | 0.13<br>ab  | 0.09<br>b   | 0.41<br>a  | 0.01<br>b   | 0.04<br>b   | 19 | 50505998 | 50511353 | NA    | -0.04 | NA   | 2.56E-09  |
| <i>FKBPIAPI</i> | 0.28<br>ab | 0.19<br>a  | 0.02<br>ab | 0.05<br>ab  | 0.29<br>a   | 0.07<br>ab | 0.03<br>ab  | 0.08<br>ab  | 19 | 57826461 | 57826778 | 0.00  | NA    | NA   | 3.41E-11  |
| <i>DEFB126</i>  | 0.10<br>ab | 0.10<br>ab | 0.07<br>ab | 0.34<br>a   | 0.13<br>ab  | 0.31<br>a  | 0.19<br>ab  | 0.05<br>ab  | 20 | 142369   | 145751   | 0.07  | NA    | 0.03 | 7.72E-13  |
| <i>C20orf96</i> | 0.58<br>b  | 0.36<br>a  | 0.00<br>b  | 0.02<br>ab  | 0.08<br>ab  | 0.08<br>b  | 0.07<br>b   | 0.12<br>b   | 20 | 270863   | 290778   | 0.01  | NA    | 0.04 | 2.44E-47  |
| <i>ZCCHC3</i>   | 0.86<br>c  | 0.52<br>a  | 0.04<br>b  | 0.18<br>ab  | 0.36<br>ab  | 0.03<br>b  | 0.20<br>ab  | 0.09<br>ab  | 20 | 296968   | 300321   | 0.08  | NA    | 0.04 | 1.21E-111 |
| <i>SOX12</i>    | 0.53<br>c  | 0.35<br>a  | 0.07<br>b  | 0.09<br>ab  | 0.35<br>ab  | 0.24<br>ab | 0.24<br>ab  | 0.17<br>ab  | 20 | 325595   | 330224   | -0.08 | NA    | 0.04 | 5.60E-51  |
| <i>NRSN2</i>    | 0.54<br>c  | 0.28<br>a  | 0.03<br>b  | 0.05<br>ab  | 0.26<br>ab  | 0.12<br>ab | 0.17<br>ab  | 0.17<br>ab  | 20 | 346782   | 359660   | 0.03  | NA    | 0.04 | 1.29E-38  |
| <i>TRIB3</i>    | 0.14<br>ab | 0.33<br>a  | 0.10<br>ab | 0.12<br>ab  | 0.44<br>a   | 0.16<br>ab | 0.26<br>a   | 0.25<br>ab  | 20 | 362835   | 397559   | 0.03  | NA    | 0.03 | 4.92E-31  |
| <i>RBCK1</i>    | 0.80<br>c  | 0.62<br>a  | 0.06<br>b  | 0.05<br>b   | 0.36<br>ab  | 0.01<br>b  | 0.13<br>b   | 0.09<br>b   | 20 | 407498   | 430966   | 0.02  | NA    | 0.04 | 1.42E-122 |
| <i>TBC1D20</i>  | 0.91<br>c  | 0.51<br>a  | 0.04<br>b  | 0.11<br>b   | 0.21<br>ab  | 0.14<br>b  | 0.17<br>ab  | 0.09<br>b   | 20 | 435480   | 462553   | 0.00  | NA    | 0.04 | 6.61E-117 |
| <i>CSNK2A1</i>  | 0.77<br>d  | 0.58<br>a  | 0.10<br>c  | 0.24<br>abc | 0.26<br>abc | 0.21<br>bc | 0.28<br>ab  | 0.27<br>abc | 20 | 473591   | 543821   | 0.00  | NA    | 0.04 | 1.93E-121 |
| <i>SRXN1</i>    | 0.44<br>b  | 0.39<br>a  | 0.10<br>b  | 0.08<br>ab  | 0.31<br>ab  | 0.25<br>ab | 0.42<br>a   | 0.21<br>ab  | 20 | 646615   | 653370   | 0.01  | NA    | 0.04 | 5.15E-57  |
| <i>SLC52A3</i>  | 0.24<br>c  | 0.22<br>a  | 0.04<br>bc | 0.06<br>abc | 0.16<br>abc | 0.17<br>ab | 0.07<br>abc | 0.14<br>bc  | 20 | 760080   | 776015   | 0.02  | NA    | 0.04 | 1.34E-13  |
| <i>FAM110A</i>  | 0.51<br>b  | 0.39<br>a  | 0.07<br>a  | 0.13<br>a   | 0.49<br>a   | 0.22<br>a  | 0.10<br>a   | 0.23<br>a   | 20 | 833715   | 857463   | 0.00  | NA    | 0.04 | 3.39E-53  |
| <i>PSMF1</i>    | 1.05<br>c  | 0.67<br>a  | 0.07<br>b  | 0.11<br>b   | 0.44<br>ab  | 0.20<br>b  | 0.27<br>b   | 0.11<br>b   | 20 | 1113263  | 1189415  | 0.06  | NA    | 0.04 | 3.66E-186 |

|                  |                 |           |                 |            |            |            |            |            |    |         |         |       |       |      |           |
|------------------|-----------------|-----------|-----------------|------------|------------|------------|------------|------------|----|---------|---------|-------|-------|------|-----------|
| <i>TMEM74B</i>   | -<br>0.12<br>ab | 0.29<br>a | -<br>0.05<br>ab | 0.07<br>ab | 0.32<br>a  | 0.08<br>ab | 0.06<br>ab | 0.10<br>ab | 20 | 1180561 | 1185415 | -0.04 | NA    | 0.04 | 2.59E-15  |
| <i>C20orf202</i> | -<br>0.18<br>ab | 0.21<br>a | -<br>0.02<br>ab | 0.20<br>ab | 0.21<br>a  | 0.05<br>ab | 0.08<br>ab | 0.05<br>ab | 20 | 1203454 | 1208274 | 0.03  | NA    | 0.04 | 5.42E-09  |
| <i>SNPH</i>      | -<br>1.77<br>e  | 1.12<br>a | -<br>0.09<br>d  | 0.04<br>cd | 0.78<br>ab | 0.21<br>bc | 0.24<br>bc | 0.26<br>bc | 20 | 1266316 | 1309328 | 0.00  | -0.04 | 0.04 | 0         |
| <i>SDCBP2</i>    | -<br>0.33<br>b  | 0.17<br>a | -<br>0.00<br>ab | 0.15<br>ab | 0.14<br>ab | 0.10<br>ab | 0.10<br>ab | 0.01<br>ab | 20 | 1309909 | 1329239 | 0.03  | NA    | 0.04 | 3.23E-13  |
| <i>FKBP1A</i>    | -<br>0.76<br>b  | 0.44<br>a | -<br>0.03<br>a  | 0.05<br>a  | 0.48<br>a  | 0.03<br>a  | 0.22<br>a  | 0.11<br>a  | 20 | 1368978 | 1393172 | 0.00  | NA    | 0.04 | 1.65E-83  |
| <i>NSFLIC</i>    | -<br>1.02<br>c  | 0.64<br>a | -<br>0.08<br>b  | 0.27<br>ab | 0.56<br>ab | 0.15<br>b  | 0.22<br>b  | 0.28<br>ab | 20 | 1442162 | 1473842 | -0.02 | NA    | 0.04 | 1.93E-175 |
| <i>SIRPA</i>     | -<br>0.25<br>b  | 0.13<br>a | -<br>0.00<br>ab | 0.12<br>ab | 0.02<br>ab | 0.04<br>ab | 0.01<br>ab | 0.11<br>ab | 20 | 1894167 | 1940592 | -0.01 | NA    | 0.04 | 8.68E-07  |
| <i>STK35</i>     | -<br>0.63<br>c  | 0.56<br>a | -<br>0.13<br>b  | 0.26<br>ab | 0.31<br>ab | 0.33<br>a  | 0.26<br>ab | 0.39<br>a  | 20 | 2101611 | 2177038 | 0.06  | NA    | 0.04 | 4.34E-109 |
| <i>TGM6</i>      | -<br>1.82<br>e  | 1.13<br>a | -<br>0.09<br>d  | 0.02<br>cd | 0.76<br>ab | 0.26<br>bc | 0.25<br>bc | 0.28<br>bc | 20 | 2380908 | 2432753 | NA    | -0.05 | 0.04 | 0         |
| <i>SNRPB</i>     | -<br>0.61<br>c  | 0.58<br>a | -<br>0.12<br>b  | 0.22<br>ab | 0.64<br>a  | 0.25<br>ab | 0.24<br>ab | 0.30<br>ab | 20 | 2461634 | 2470853 | -0.01 | NA    | 0.04 | 8.01E-109 |
| <i>ZNF343</i>    | -<br>0.81<br>c  | 0.57<br>a | -<br>0.09<br>b  | 0.21<br>b  | 0.34<br>ab | 0.24<br>b  | 0.21<br>b  | 0.16<br>b  | 20 | 2481817 | 2524702 | 0.08  | NA    | 0.04 | 8.30E-123 |
| <i>TMC2</i>      | -<br>0.30<br>b  | 0.18<br>a | -<br>0.00<br>ab | 0.00<br>ab | 0.10<br>ab | 0.03<br>ab | 0.10<br>ab | 0.02<br>ab | 20 | 2536607 | 2641784 | -0.01 | NA    | 0.04 | 3.89E-11  |
| <i>NOP56</i>     | -<br>0.64<br>c  | 0.55<br>a | -<br>0.10<br>b  | 0.08<br>b  | 0.49<br>ab | 0.15<br>b  | 0.22<br>ab | 0.29<br>ab | 20 | 2652145 | 2658393 | 0.07  | NA    | 0.04 | 3.45E-96  |
| <i>IDH3B</i>     | -<br>0.91<br>c  | 0.62<br>a | -<br>0.06<br>b  | 0.18<br>b  | 0.42<br>ab | 0.00<br>b  | 0.19<br>b  | 0.27<br>ab | 20 | 2658395 | 2664219 | -0.04 | NA    | 0.04 | 1.62E-143 |
| <i>EBF4</i>      | -<br>0.40<br>b  | 0.08<br>a | -<br>0.03<br>a  | 0.13<br>ab | 0.20<br>ab | 0.07<br>a  | 0.07<br>ab | 0.17<br>a  | 20 | 2692878 | 2760108 | 0.01  | NA    | 0.04 | 1.39E-14  |
| <i>PCED1A</i>    | -<br>0.64<br>b  | 0.46<br>a | -<br>0.03<br>a  | 0.00<br>a  | 0.52<br>a  | 0.03<br>a  | 0.02<br>a  | 0.15<br>ab | 20 | 2835314 | 2841190 | 0.04  | NA    | 0.04 | 6.69E-69  |
| <i>VPS16</i>     | -<br>0.92<br>c  | 0.61<br>a | -<br>0.08<br>b  | 0.16<br>b  | 0.56<br>ab | 0.17<br>b  | 0.20<br>b  | 0.25<br>ab | 20 | 2840703 | 2866732 | 0.02  | NA    | 0.04 | 2.78E-148 |
| <i>PTPRA</i>     | -<br>0.88<br>c  | 0.52<br>a | -<br>0.04<br>b  | 0.10<br>b  | 0.27<br>ab | 0.18<br>b  | 0.11<br>b  | 0.12<br>b  | 20 | 2864184 | 3039076 | 0.08  | NA    | 0.04 | 6.66E-115 |
| <i>MRPS26</i>    | -<br>0.76<br>c  | 0.57<br>a | -<br>0.06<br>b  | 0.05<br>b  | 0.42<br>ab | 0.08<br>b  | 0.15<br>b  | 0.07<br>b  | 20 | 3045945 | 3048254 | 0.05  | NA    | 0.04 | 3.16E-106 |
| <i>OXT</i>       | -<br>1.81<br>e  | 1.15<br>a | -<br>0.10<br>d  | 0.04<br>cd | 0.76<br>ab | 0.25<br>bc | 0.24<br>bc | 0.28<br>bc | 20 | 3071620 | 3072517 | NA    | 0.01  | 0.04 | 0         |
| <i>UBOX5</i>     | -<br>0.90<br>c  | 0.51<br>a | -<br>0.03<br>b  | 0.02<br>b  | 0.31<br>ab | 0.22<br>ab | 0.11<br>b  | 0.05<br>b  | 20 | 3107573 | 3160196 | 0.00  | NA    | 0.04 | 1.43E-115 |
| <i>FASTKD5</i>   | -<br>0.78<br>c  | 0.55<br>a | -<br>0.07<br>b  | 0.16<br>ab | 0.40<br>ab | 0.12<br>b  | 0.20<br>ab | 0.14<br>ab | 20 | 3146519 | 3159897 | 0.06  | NA    | 0.04 | 1.38E-107 |
| <i>DDRGI1</i>    | -<br>0.84<br>c  | 0.52<br>a | -<br>0.01<br>b  | 0.13<br>b  | 0.14<br>ab | 0.02<br>b  | 0.02<br>b  | 0.02<br>b  | 20 | 3190350 | 3204685 | 0.06  | NA    | 0.04 | 3.47E-104 |

|                  |                 |           |            |            |             |            |             |            |    |         |         |       |       |      |           |
|------------------|-----------------|-----------|------------|------------|-------------|------------|-------------|------------|----|---------|---------|-------|-------|------|-----------|
| <i>ITPA</i>      | -<br>0.76<br>c  | 0.51<br>a | 0.05<br>b  | 0.18<br>ab | 0.39<br>ab  | 0.02<br>b  | 0.17<br>ab  | 0.09<br>ab | 20 | 3208868 | 3223870 | 0.02  | NA    | 0.04 | 1.49E-94  |
| <i>SLC4A11</i>   | -<br>0.37<br>b  | 0.14<br>a | 0.02<br>ab | 0.09<br>ab | 0.04<br>ab  | 0.03<br>ab | 0.02<br>ab  | 0.13<br>ab | 20 | 3227417 | 3239190 | 0.08  | NA    | 0.04 | 5.10E-13  |
| <i>C20orf194</i> | -<br>0.56<br>ab | 0.12<br>a | 0.02<br>a  | 0.12<br>a  | 0.16<br>a   | 0.15<br>a  | 0.06<br>a   | 0.07<br>ab | 20 | 3249305 | 3407625 | 0.02  | NA    | 0.04 | 2.36E-28  |
| <i>ATRN</i>      | -<br>0.74<br>c  | 0.36<br>a | 0.05<br>b  | 0.17<br>ab | 0.17<br>ab  | 0.32<br>a  | 0.31<br>a   | 0.13<br>ab | 20 | 3471040 | 3651122 | 0.03  | NA    | 0.04 | 2.33E-78  |
| <i>ADAM33</i>    | -<br>1.83<br>e  | 1.13<br>a | 0.09<br>d  | 0.03<br>cd | 0.74<br>ab  | 0.24<br>bc | 0.24<br>bc  | 0.33<br>bc | 20 | 3667965 | 3682246 | NA    | -0.01 | 0.04 | 0         |
| <i>HSPA12B</i>   | -<br>1.74<br>d  | 1.11<br>a | 0.10<br>c  | 0.08<br>bc | 0.73<br>ab  | 0.22<br>b  | 0.26<br>b   | 0.37<br>b  | 20 | 3732667 | 3753111 | NA    | -0.06 | 0.04 | 0         |
| <i>C20orf27</i>  | -<br>1.71<br>e  | 1.13<br>a | 0.11<br>d  | 0.07<br>cd | 0.81<br>ab  | 0.23<br>bc | 0.25<br>bc  | 0.32<br>bc | 20 | 3753508 | 3768387 | 0.05  | 0.05  | 0.04 | 0         |
| <i>SPEF1</i>     | -<br>0.36<br>b  | 0.23<br>a | 0.00<br>b  | 0.03<br>ab | 0.11<br>ab  | 0.04<br>b  | 0.03<br>b   | 0.05<br>b  | 20 | 3777504 | 3781448 | 0.00  | NA    | 0.04 | 1.58E-16  |
| <i>CENPB</i>     | -<br>0.88<br>c  | 0.57<br>a | 0.04<br>b  | 0.07<br>b  | 0.37<br>ab  | 0.06<br>b  | 0.06<br>b   | 0.16<br>ab | 20 | 3783851 | 3786690 | 0.04  | NA    | 0.04 | 2.18E-121 |
| <i>CDC25B</i>    | -<br>0.27<br>ab | 0.45<br>a | 0.10<br>ab | 0.18<br>ab | 0.49<br>a   | 0.07<br>ab | 0.14<br>ab  | 0.15<br>ab | 20 | 3786772 | 3806121 | -0.05 | NA    | 0.04 | 4.42E-46  |
| <i>AP5SI</i>     | -<br>0.87<br>c  | 0.60<br>a | 0.05<br>b  | 0.01<br>b  | 0.47<br>ab  | 0.03<br>b  | 0.10<br>b   | 0.04<br>b  | 20 | 3820524 | 3828837 | 0.04  | NA    | 0.04 | 6.14E-128 |
| <i>MAVS</i>      | -<br>0.73<br>d  | 0.52<br>a | 0.06<br>c  | 0.00<br>bc | 0.17<br>abc | 0.24<br>ab | 0.17<br>abc | 0.02<br>bc | 20 | 3846799 | 3876123 | 0.00  | NA    | 0.04 | 1.68E-95  |
| <i>PANK2</i>     | -<br>0.94<br>c  | 0.49<br>a | 0.03<br>b  | 0.19<br>ab | 0.38<br>ab  | 0.01<br>b  | 0.19<br>ab  | 0.18<br>ab | 20 | 3888839 | 3929882 | 0.06  | NA    | 0.04 | 1.77E-118 |
| <i>RNF24</i>     | -<br>0.53<br>b  | 0.30<br>a | 0.05<br>b  | 0.15<br>ab | 0.24<br>ab  | 0.21<br>ab | 0.22<br>ab  | 0.06<br>ab | 20 | 3927309 | 4015582 | 0.01  | NA    | 0.04 | 6.54E-42  |
| <i>SMOX</i>      | -<br>1.79<br>e  | 1.14<br>a | 0.10<br>d  | 0.01<br>cd | 0.75<br>ab  | 0.23<br>bc | 0.23<br>bc  | 0.30<br>bc | 20 | 4120980 | 4187747 | 0.02  | -0.13 | 0.04 | 0         |
| <i>PRNP</i>      | -<br>0.46<br>ab | 0.17<br>a | 0.01<br>ab | 0.13<br>a  | 0.31<br>a   | 0.04<br>ab | 0.04<br>a   | 0.01<br>ab | 20 | 4686236 | 4701590 | 0.01  | NA    | 0.04 | 6.22E-21  |
| <i>PRND</i>      | -<br>1.79<br>e  | 1.13<br>a | 0.10<br>d  | 0.04<br>cd | 0.77<br>ab  | 0.27<br>bc | 0.21<br>bc  | 0.33<br>bc | 20 | 4721910 | 4728460 | NA    | -0.07 | 0.04 | 0         |
| <i>SLC23A2</i>   | -<br>0.54<br>b  | 0.18<br>a | 0.01<br>ab | 0.16<br>ab | 0.16<br>ab  | 0.22<br>a  | 0.04<br>ab  | 0.06<br>ab | 20 | 4852356 | 5010293 | 0.02  | NA    | 0.04 | 2.17E-30  |
| <i>TMEM230</i>   | -<br>0.87<br>c  | 0.58<br>a | 0.05<br>b  | 0.19<br>ab | 0.18<br>ab  | 0.13<br>b  | 0.07<br>b   | 0.04<br>b  | 20 | 5068232 | 5113103 | 0.05  | NA    | 0.04 | 5.73E-124 |
| <i>PCNA</i>      | -<br>0.48<br>b  | 0.50<br>a | 0.12<br>a  | 0.31<br>a  | 0.58<br>a   | 0.17<br>a  | 0.22<br>a   | 0.35<br>a  | 20 | 5114953 | 5126626 | 0.00  | NA    | 0.04 | 3.74E-78  |
| <i>CDS2</i>      | -<br>0.82<br>c  | 0.51<br>a | 0.06<br>b  | 0.11<br>b  | 0.42<br>ab  | 0.28<br>ab | 0.12<br>b   | 0.09<br>b  | 20 | 5126786 | 5197887 | 0.00  | NA    | 0.04 | 1.04E-108 |
| <i>PROKR2</i>    | -<br>1.82<br>e  | 1.15<br>a | 0.10<br>d  | 0.05<br>cd | 0.76<br>ab  | 0.27<br>bc | 0.22<br>bc  | 0.27<br>bc | 20 | 5302040 | 5314369 | NA    | -0.03 | 0.04 | 0         |
| <i>GPCPD1</i>    | -<br>0.48<br>c  | 0.32<br>a | 0.00<br>b  | 0.11<br>ab | 0.09<br>bc  | 0.11<br>bc | 0.17<br>bc  | 0.05<br>ab | 20 | 5544404 | 5611026 | -0.04 | NA    | 0.04 | 2.83E-35  |



|                  |                 |            |            |                |                 |                 |                 |             |    |          |          |       |       |      |           |
|------------------|-----------------|------------|------------|----------------|-----------------|-----------------|-----------------|-------------|----|----------|----------|-------|-------|------|-----------|
| <i>C20orf196</i> | -<br>0.63<br>c  | 0.41<br>a  | 0.01<br>b  | -<br>0.08<br>b | -<br>0.09<br>bc | -<br>0.15<br>bc | -<br>0.13<br>bc | 0.02<br>ab  | 20 | 5750393  | 5863912  | 0.04  | NA    | 0.04 | 1.42E-59  |
| <i>CHGB</i>      | -<br>0.24<br>ab | 0.04<br>ab | 0.05<br>a  | 0.20<br>ab     | 0.24<br>ab      | 0.12<br>ab      | 0.12<br>ab      | 0.05<br>a   | 20 | 5911430  | 5925361  | 0.00  | NA    | 0.04 | 1.59E-07  |
| <i>TRMT6</i>     | -<br>0.65<br>c  | 0.63<br>a  | 0.13<br>b  | 0.47<br>a      | 0.66<br>a       | 0.14<br>ab      | 0.23<br>a       | 0.37<br>a   | 20 | 5937235  | 5950558  | 0.05  | NA    | 0.04 | 2.67E-127 |
| <i>MCM8</i>      | -<br>0.45<br>b  | 0.48<br>a  | 0.14<br>a  | 0.39<br>a      | 0.53<br>a       | 0.29<br>a       | 0.28<br>a       | 0.33<br>a   | 20 | 5950652  | 5998977  | 0.08  | NA    | 0.04 | 3.12E-81  |
| <i>CRLS1</i>     | -<br>0.74<br>c  | 0.56<br>a  | 0.04<br>b  | 0.09<br>b      | 0.16<br>ab      | 0.05<br>b       | 0.13<br>b       | 0.06<br>b   | 20 | 6006090  | 6040053  | -0.04 | NA    | 0.04 | 3.67E-99  |
| <i>LRRN4</i>     | -<br>1.82<br>e  | 1.13<br>a  | 0.09<br>d  | 0.02<br>cd     | 0.73<br>ab      | 0.25<br>bc      | 0.21<br>bc      | 0.25<br>bc  | 20 | 6040778  | 6054049  | 0.00  | -0.23 | 0.04 | 0         |
| <i>FERMT1</i>    | -<br>1.71<br>d  | 1.08<br>a  | 0.09<br>c  | 0.08<br>bc     | 0.70<br>ab      | 0.22<br>b       | 0.22<br>b       | 0.21<br>bc  | 20 | 6074845  | 6123544  | 0.05  | 0.29  | 0.04 | 0         |
| <i>BMP2</i>      | -<br>0.31<br>b  | 0.14<br>a  | 0.03<br>ab | 0.10<br>ab     | 0.07<br>ab      | 0.23<br>b       | 0.06<br>ab      | 0.02<br>ab  | 20 | 6767664  | 6780280  | -0.07 | NA    | 0.04 | 6.35E-13  |
| <i>TMX4</i>      | -<br>0.61<br>c  | 0.28<br>a  | 0.02<br>b  | 0.10<br>ab     | 0.17<br>bc      | 0.14<br>b       | 0.02<br>ab      | 0.03<br>ab  | 20 | 7977348  | 8019829  | 0.11  | NA    | 0.04 | 1.08E-42  |
| <i>PLCB1</i>     | -<br>0.37<br>b  | 0.16<br>a  | 0.00<br>a  | 0.17<br>a      | 0.16<br>ab      | 0.01<br>ab      | 0.08<br>a       | 0.03<br>ab  | 20 | 8077251  | 8968360  | 0.02  | NA    | 0.04 | 3.30E-14  |
| <i>PLCB4</i>     | -<br>0.16<br>a  | 0.10<br>a  | 0.04<br>a  | 0.06<br>a      | 0.68<br>a       | 0.22<br>a       | 0.17<br>a       | 0.09<br>a   | 20 | 9068763  | 9481242  | 0.05  | NA    | 0.04 | 6.38E-11  |
| <i>ANKEF1</i>    | -<br>0.48<br>c  | 0.41<br>a  | 0.08<br>bc | 0.28<br>ab     | 0.17<br>abc     | 0.30<br>a       | 0.10<br>abc     | 0.06<br>abc | 20 | 9986126  | 10058303 | 0.07  | NA    | 0.04 | 3.15E-56  |
| <i>SNAP25</i>    | -<br>0.22<br>ab | 0.05<br>a  | 0.04<br>a  | 0.12<br>a      | 0.04<br>ab      | 0.08<br>ab      | 0.21<br>ab      | 0.07<br>ab  | 20 | 10218830 | 10307418 | 0.01  | NA    | 0.04 | 3.55E-06  |
| <i>MKKS</i>      | -<br>0.92<br>c  | 0.59<br>a  | 0.06<br>b  | 0.20<br>ab     | 0.30<br>ab      | 0.09<br>b       | 0.19<br>b       | 0.22<br>ab  | 20 | 10401009 | 10434222 | 0.05  | NA    | 0.04 | 3.32E-139 |
| <i>SLX4IP</i>    | -<br>0.43<br>c  | 0.31<br>a  | 0.07<br>bc | 0.29<br>ab     | 0.22<br>abc     | 0.32<br>a       | 0.18<br>abc     | 0.08<br>abc | 20 | 10435303 | 10636829 | 0.01  | NA    | 0.04 | 4.54E-41  |
| <i>JAG1</i>      | -<br>0.42<br>c  | 0.22<br>a  | 0.02<br>bc | 0.19<br>ab     | 0.16<br>abc     | 0.13<br>abc     | 0.07<br>bc      | 0.13<br>abc | 20 | 10637684 | 10674107 | 0.00  | NA    | 0.04 | 1.37E-22  |
| <i>BTBD3</i>     | -<br>0.58<br>c  | 0.30<br>a  | 0.02<br>bc | 0.28<br>ab     | 0.14<br>abc     | 0.03<br>bc      | 0.16<br>ab      | 0.12<br>abc | 20 | 11890723 | 11926609 | 0.06  | NA    | 0.03 | 2.76E-44  |
| <i>SPTLC3</i>    | -<br>0.44<br>b  | 0.10<br>a  | 0.06<br>a  | 0.16<br>a      | 0.20<br>ab      | 0.24<br>ab      | 0.16<br>ab      | 0.03<br>ab  | 20 | 13008979 | 13169103 | 0.01  | NA    | 0.03 | 4.76E-23  |
| <i>TASPI</i>     | -<br>0.75<br>c  | 0.49<br>a  | 0.05<br>b  | 0.26<br>ab     | 0.29<br>ab      | 0.08<br>b       | 0.11<br>b       | 0.08<br>b   | 20 | 13389392 | 13638940 | -0.08 | NA    | 0.03 | 2.45E-89  |
| <i>ESF1</i>      | -<br>0.58<br>c  | 0.49<br>a  | 0.10<br>b  | 0.32<br>ab     | 0.45<br>ab      | 0.20<br>ab      | 0.18<br>ab      | 0.21<br>ab  | 20 | 13714322 | 13784886 | 0.05  | NA    | 0.03 | 1.21E-80  |
| <i>NDUFAF5</i>   | -<br>0.81<br>c  | 0.59<br>a  | 0.06<br>b  | 0.21<br>ab     | 0.45<br>ab      | 0.00<br>b       | 0.08<br>b       | 0.18<br>ab  | 20 | 13784950 | 13821582 | 0.07  | NA    | 0.03 | 2.31E-117 |
| <i>MACROD2</i>   | -<br>0.36<br>b  | 0.10<br>a  | 0.06<br>ab | 0.06<br>ab     | 0.09<br>ab      | 0.22<br>ab      | 0.12<br>ab      | 0.20<br>ab  | 20 | 13995369 | 16053197 | 0.01  | NA    | 0.03 | 4.52E-17  |
| <i>FLRT3</i>     | -<br>0.35<br>b  | 0.15<br>a  | 0.02<br>ab | 0.20<br>a      | 0.06<br>ab      | 0.11<br>ab      | 0.15<br>ab      | 0.14<br>ab  | 20 | 14322988 | 14337616 | 0.02  | NA    | 0.03 | 8.51E-15  |

|                  |                 |                 |                  |                 |                  |                  |                  |                 |    |             |             |       |       |      |           |
|------------------|-----------------|-----------------|------------------|-----------------|------------------|------------------|------------------|-----------------|----|-------------|-------------|-------|-------|------|-----------|
| <i>KIF16B</i>    | -<br>0.53<br>c  | -<br>0.39<br>a  | -<br>0.07<br>bc  | -<br>0.22<br>ab | -<br>0.18<br>abc | -<br>0.25<br>a   | -<br>0.13<br>abc | -<br>0.18<br>ab | 20 | 16272104    | 16573434    | 0.04  | NA    | 0.03 | 1.10E-55  |
| <i>SNRPB2</i>    | -<br>0.74<br>c  | -<br>0.67<br>a  | -<br>0.10<br>b   | -<br>0.26<br>ab | -<br>0.62<br>ab  | -<br>0.00<br>b   | -<br>0.17<br>b   | -<br>0.24<br>ab | 20 | 16729961    | 16742563    | -0.03 | NA    | 0.03 | 1.35E-133 |
| <i>BFSP1</i>     | -<br>0.37<br>ac | -<br>0.35<br>a  | -<br>0.07<br>abc | -<br>0.26<br>ab | -<br>0.40<br>a   | -<br>0.03<br>abc | -<br>0.23<br>ab  | -<br>0.26<br>ab | 20 | 17493905    | 17569220    | 0.04  | NA    | 0.03 | 3.55E-38  |
| <i>DSTN</i>      | -<br>0.66<br>c  | -<br>0.36<br>a  | -<br>0.02<br>b   | -<br>0.13<br>ab | -<br>0.18<br>ab  | -<br>0.04<br>ab  | -<br>0.12<br>ab  | -<br>0.08<br>ab | 20 | 17569863    | 17609919    | 0.12  | NA    | 0.03 | 1.05E-57  |
| <i>RRBP1</i>     | -<br>1.72<br>e  | -<br>1.09<br>a  | -<br>0.09<br>d   | -<br>0.07<br>cd | -<br>0.78<br>ab  | -<br>0.22<br>bc  | -<br>0.20<br>bc  | -<br>0.26<br>bc | 20 | 17613678    | 17682295    | 0.02  | -0.01 | 0.03 | 0         |
| <i>SNX5</i>      | -<br>0.79<br>c  | -<br>0.46<br>a  | -<br>0.02<br>b   | -<br>0.06<br>b  | -<br>0.30<br>ab  | -<br>0.07<br>b   | -<br>0.11<br>ab  | -<br>0.13<br>b  | 20 | 17941597    | 17968980    | 0.00  | NA    | 0.03 | 7.95E-87  |
| <i>SNORD17</i>   | -<br>0.42<br>b  | -<br>0.25<br>a  | -<br>0.04<br>ab  | -<br>0.10<br>a  | -<br>0.41<br>a   | -<br>0.18<br>a   | -<br>0.18<br>a   | -<br>0.01<br>ab | 20 | 17962710    | 17962946    | 0.03  | NA    | 0.03 | 1.50E-28  |
| <i>MGME1</i>     | -<br>0.68<br>c  | -<br>0.58<br>a  | -<br>0.13<br>b   | -<br>0.41<br>a  | -<br>0.71<br>a   | -<br>0.25<br>ab  | -<br>0.31<br>a   | -<br>0.25<br>ab | 20 | 17968913    | 17991122    | -0.03 | NA    | 0.03 | 9.72E-124 |
| <i>ZNF133</i>    | -<br>0.81<br>c  | -<br>0.55<br>a  | -<br>0.07<br>b   | -<br>0.22<br>ab | -<br>0.53<br>ab  | -<br>0.11<br>b   | -<br>0.15<br>b   | -<br>0.15<br>ab | 20 | 18288283    | 18316996    | 0.07  | NA    | 0.03 | 5.22E-113 |
| <i>DZANK1</i>    | -<br>0.51<br>c  | -<br>0.42<br>a  | -<br>0.04<br>bc  | -<br>0.14<br>ab | -<br>0.07<br>abc | -<br>0.01<br>bc  | -<br>0.10<br>bc  | -<br>0.09<br>ab | 20 | 18383367    | 18467281    | 0.00  | NA    | 0.03 | 5.46E-50  |
| <i>POLR3F</i>    | -<br>0.75<br>c  | -<br>0.60<br>a  | -<br>0.09<br>b   | -<br>0.32<br>ab | -<br>0.45<br>ab  | -<br>0.09<br>b   | -<br>0.15<br>b   | -<br>0.23<br>ab | 20 | 18467127    | 18484643    | 0.08  | NA    | 0.03 | 1.19E-117 |
| <i>RBBP9</i>     | -<br>0.74<br>c  | -<br>0.43<br>a  | -<br>0.02<br>b   | -<br>0.25<br>ab | -<br>0.10<br>ab  | -<br>0.03<br>b   | -<br>0.02<br>b   | -<br>0.06<br>ab | 20 | 18486540    | 18497243    | 0.02  | NA    | 0.03 | 2.23E-76  |
| <i>SEC23B</i>    | -<br>0.63<br>c  | -<br>0.37<br>a  | -<br>0.03<br>bc  | -<br>0.06<br>ab | -<br>0.02<br>abc | -<br>0.14<br>ab  | -<br>0.08<br>ab  | -<br>0.08<br>ab | 20 | 18507493    | 18561415    | 0.00  | NA    | 0.03 | 1.19E-55  |
| <i>SMIM26</i>    | -<br>0.90<br>c  | -<br>0.58<br>a  | -<br>0.03<br>b   | -<br>0.09<br>b  | -<br>0.26<br>ab  | -<br>0.02<br>b   | -<br>0.05<br>b   | -<br>0.01<br>b  | 20 | 18567347    | 18569563    | 0.00  | NA    | 0.03 | 5.27E-126 |
| <i>DTD1</i>      | -<br>0.58<br>c  | -<br>0.46<br>a  | -<br>0.04<br>b   | -<br>0.12<br>ab | -<br>0.26<br>ab  | -<br>0.18<br>b   | -<br>0.16<br>ab  | -<br>0.19<br>ab | 20 | 18567453    | 18763917    | -0.07 | NA    | 0.03 | 1.65E-66  |
| <i>LINC00652</i> | -<br>0.16<br>b  | -<br>0.30<br>a  | -<br>0.04<br>b   | -<br>0.04<br>b  | -<br>0.05<br>b   | -<br>0.07<br>b   | -<br>0.11<br>b   | -<br>0.07<br>ab | 20 | 18786065    | 18794335    | -0.07 | NA    | 0.03 | 1.24E-15  |
| <i>SLC24A3</i>   | -<br>0.19<br>ab | -<br>0.09<br>a  | -<br>0.03<br>ab  | -<br>0.04<br>ab | -<br>0.02<br>ab  | -<br>0.01<br>ab  | -<br>0.30<br>b   | -<br>0.15<br>ab | 20 | 19212646    | 19722937    | -0.07 | NA    | 0.03 | 2.92E-07  |
| <i>RIN2</i>      | -<br>0.46<br>b  | -<br>0.31<br>a  | -<br>0.04<br>b   | -<br>0.15<br>ab | -<br>0.23<br>ab  | -<br>0.05<br>ab  | -<br>0.11<br>ab  | -<br>0.07<br>ab | 20 | 19886521    | 20002457    | 0.03  | NA    | 0.03 | 1.21E-32  |
| <i>NAA20</i>     | -<br>0.61<br>c  | -<br>0.60<br>a  | -<br>0.13<br>b   | -<br>0.25<br>b  | -<br>0.53<br>ab  | -<br>0.27<br>b   | -<br>0.22<br>b   | -<br>0.22<br>b  | 20 | 20017116    | 20033655    | -0.04 | NA    | 0.03 | 3.61E-110 |
| <i>CRNKLI</i>    | -<br>0.73<br>c  | -<br>0.50<br>a  | -<br>0.07<br>b   | -<br>0.23<br>ab | -<br>0.15<br>ab  | -<br>0.20<br>ab  | -<br>0.15<br>ab  | -<br>0.15<br>ab | 20 | 20034368    | 20056046    | 0.05  | NA    | 0.03 | 5.95E-93  |
| <i>DEFB127</i>   | -<br>0.10<br>ab | -<br>0.10<br>ab | -<br>0.07<br>ab  | -<br>0.34<br>a  | -<br>0.13<br>ab  | -<br>0.31<br>a   | -<br>0.19<br>ab  | -<br>0.05<br>ab | 20 | 17786826.02 | 17952273.32 | 0.01  | NA    | 0.03 | -7.80E-11 |
| <i>C20orf97</i>  | -<br>0.58<br>b  | -<br>0.36<br>a  | -<br>0.00<br>b   | -<br>0.02<br>ab | -<br>0.08<br>ab  | -<br>0.08<br>b   | -<br>0.07<br>b   | -<br>0.12<br>b  | 20 | 17990961.07 | 18157997.76 | 0.01  | NA    | 0.03 | -7.88E-11 |
| <i>ZCCHC4</i>    | -<br>0.86<br>c  | -<br>0.52<br>a  | -<br>0.04<br>b   | -<br>0.18<br>ab | -<br>0.36<br>ab  | -<br>0.03<br>b   | -<br>0.20<br>ab  | -<br>0.09<br>ab | 20 | 18195096.11 | 18363722.19 | 0.00  | NA    | 0.03 | -7.96E-11 |

|                     |                 |            |            |             |             |            |             |             |    |             |             |       |       |      |           |
|---------------------|-----------------|------------|------------|-------------|-------------|------------|-------------|-------------|----|-------------|-------------|-------|-------|------|-----------|
| <i>SOX13</i>        | -<br>0.53<br>c  | 0.35<br>a  | 0.07<br>b  | 0.09<br>ab  | 0.35<br>ab  | 0.24<br>ab | 0.24<br>ab  | 0.17<br>ab  | 20 | 18399231.16 | 18569446.62 | 0.00  | NA    | 0.03 | -8.03E-11 |
| <i>NRSN3</i>        | -<br>0.54<br>c  | 0.28<br>a  | 0.03<br>b  | 0.05<br>ab  | 0.26<br>ab  | 0.12<br>ab | 0.17<br>ab  | 0.17<br>ab  | 20 | 18603366.21 | 18775171.06 | 0.00  | NA    | 0.03 | -8.11E-11 |
| <i>TRIB4</i>        | -<br>0.14<br>ab | 0.33<br>a  | 0.10<br>ab | 0.12<br>ab  | 0.44<br>a   | 0.16<br>ab | 0.26<br>a   | 0.25<br>ab  | 20 | 18807501.26 | 18980895.49 | 0.00  | NA    | 0.03 | -8.19E-11 |
| <i>RBCK2</i>        | -<br>0.80<br>c  | 0.62<br>a  | 0.06<br>b  | 0.05<br>b   | 0.36<br>ab  | 0.01<br>b  | 0.13<br>b   | 0.09<br>b   | 20 | 19011636.3  | 19186619.92 | 0.00  | NA    | 0.03 | -8.27E-11 |
| <i>TBC1D21</i>      | -<br>0.91<br>c  | 0.51<br>a  | 0.04<br>b  | 0.11<br>b   | 0.21<br>ab  | 0.14<br>b  | 0.17<br>ab  | 0.09<br>b   | 20 | 19215771.35 | 19392344.35 | 0.00  | NA    | 0.03 | -8.34E-11 |
| <i>CSNK2A2</i>      | -<br>0.77<br>d  | 0.58<br>a  | 0.10<br>c  | 0.24<br>abc | 0.26<br>abc | 0.21<br>bc | 0.28<br>ab  | 0.27<br>abc | 20 | 19419906.4  | 19598068.79 | 0.00  | NA    | 0.03 | -8.42E-11 |
| <i>SRXN2</i>        | -<br>0.44<br>b  | 0.39<br>a  | 0.10<br>b  | 0.08<br>ab  | 0.31<br>ab  | 0.25<br>ab | 0.42<br>a   | 0.21<br>ab  | 20 | 19624041.44 | 19803793.22 | 0.00  | NA    | 0.03 | -8.50E-11 |
| <i>SLC52A4</i>      | -<br>0.24<br>c  | 0.22<br>a  | 0.04<br>bc | 0.06<br>abc | 0.16<br>abc | 0.17<br>ab | 0.07<br>abc | 0.14<br>bc  | 20 | 19828176.49 | 20009517.65 | 0.00  | NA    | 0.03 | -8.57E-11 |
| <i>FAM110A</i>      | -<br>0.51<br>b  | 0.39<br>a  | 0.07<br>a  | 0.13<br>a   | 0.49<br>a   | 0.22<br>a  | 0.10<br>a   | 0.23<br>a   | 20 | 20032311.54 | 20215242.08 | 0.00  | NA    | 0.03 | -8.65E-11 |
| <i>PSMF2</i>        | -<br>1.05<br>c  | 0.67<br>a  | 0.07<br>b  | 0.11<br>b   | 0.44<br>ab  | 0.20<br>b  | 0.27<br>b   | 0.11<br>b   | 20 | 20236446.59 | 20420966.52 | 0.00  | NA    | 0.03 | -8.73E-11 |
| <i>TMEM74B</i>      | -<br>0.12<br>ab | 0.29<br>a  | 0.05<br>ab | 0.07<br>ab  | 0.32<br>a   | 0.08<br>ab | 0.06<br>ab  | 0.10<br>ab  | 20 | 20440581.63 | 20626690.95 | 0.00  | NA    | 0.03 | -8.81E-11 |
| <i>C20orf203</i>    | -<br>0.18<br>ab | 0.21<br>a  | 0.02<br>ab | 0.20<br>ab  | 0.21<br>a   | 0.05<br>ab | 0.08<br>ab  | 0.05<br>ab  | 20 | 20644716.68 | 20832415.38 | 0.00  | NA    | 0.03 | -8.88E-11 |
| <i>SNPH</i>         | -<br>1.77<br>e  | 1.12<br>a  | 0.09<br>d  | 0.04<br>cd  | 0.78<br>ab  | 0.21<br>bc | 0.24<br>bc  | 0.26<br>bc  | 20 | 20848851.73 | 21038139.82 | -0.01 | -0.04 | 0.03 | -9E-11    |
| <i>SDCBP3</i>       | -<br>0.33<br>b  | 0.17<br>a  | 0.00<br>ab | 0.15<br>ab  | 0.14<br>ab  | 0.10<br>ab | 0.10<br>ab  | 0.01<br>ab  | 20 | 21052986.78 | 21243864.25 | -0.01 | NA    | 0.03 | -9.04E-11 |
| <i>FKBP1A</i>       | -<br>0.76<br>b  | 0.44<br>a  | 0.03<br>a  | 0.05<br>a   | 0.48<br>a   | 0.03<br>a  | 0.22<br>a   | 0.11<br>a   | 20 | 21257121.82 | 21449588.68 | -0.01 | NA    | 0.03 | -9.12E-11 |
| <i>NSFLIC</i>       | -<br>1.02<br>c  | 0.64<br>a  | 0.08<br>b  | 0.27<br>ab  | 0.56<br>ab  | 0.15<br>b  | 0.22<br>b   | 0.28<br>ab  | 20 | 21461256.87 | 21655313.11 | -0.01 | NA    | 0.03 | -9.19E-11 |
| <i>SIRPA</i>        | -<br>0.25<br>b  | 0.13<br>a  | 0.00<br>ab | 0.12<br>ab  | 0.02<br>ab  | 0.04<br>ab | 0.01<br>ab  | 0.11<br>ab  | 20 | 21665391.92 | 21861037.55 | -0.01 | NA    | 0.03 | -9.27E-11 |
| <i>MUC6</i>         | -<br>0.11<br>b  | 0.15<br>ab | 0.06<br>b  | 0.43<br>a   | 0.17<br>ab  | 0.10<br>ab | 0.04<br>ab  | 0.32<br>ab  | *  | 1012821     | 1043528     | NA    | 0.00  | NA   | 1.99E-12  |
| <i>KAT14</i>        | -<br>0.83<br>c  | 0.50<br>a  | 0.03<br>b  | 0.04<br>b   | 0.20<br>ab  | 0.08<br>b  | 0.10<br>b   | 0.14<br>ab  | NA | NA          | NA          | NA    | NA    | NA   | 4.33E-101 |
| <i>LOC653566</i>    | -<br>0.02<br>b  | 0.03<br>b  | 0.01<br>b  | 0.05<br>b   | 0.29<br>bc  | 0.67<br>a  | 0.03<br>b   | 1.04<br>c   | NA | NA          | NA          | NA    | NA    | NA   | 2.59E-53  |
| <i>LOC100270804</i> | -<br>0.42<br>b  | 0.37<br>a  | 0.04<br>b  | 0.13<br>ab  | 0.28<br>ab  | 0.03<br>b  | 0.04<br>b   | 0.05<br>b   | NA | NA          | NA          | NA    | NA    | NA   | 2.85E-36  |
| <i>LOC100130987</i> | -<br>0.01<br>b  | 0.10<br>b  | 0.01<br>b  | 0.10<br>ab  | 0.27<br>b   | 0.54<br>a  | 0.03<br>b   | 0.49<br>b   | NA | NA          | NA          | NA    | NA    | NA   | 2.12E-23  |
| <i>ProSAPiP1</i>    | -<br>0.35<br>b  | 0.27<br>a  | 0.00<br>b  | 0.09<br>ab  | 0.10<br>b   | 0.16<br>b  | 0.06<br>ab  | 0.25<br>b   | NA | NA          | NA          | NA    | NA    | NA   | 9.78E-23  |

|                     |                 |                 |                 |                 |                 |                 |                 |                 |    |    |    |    |    |    |          |
|---------------------|-----------------|-----------------|-----------------|-----------------|-----------------|-----------------|-----------------|-----------------|----|----|----|----|----|----|----------|
| <i>LOC645332</i>    | -<br>0.11<br>bc | -<br>0.00<br>b  | -<br>0.00<br>b  | -<br>0.08<br>bc | -<br>0.40<br>bc | -<br>0.50<br>a  | -<br>0.06<br>bc | -<br>0.53<br>c  | NA | NA | NA | NA | NA | NA | 2.62E-22 |
| <i>LOC100289673</i> | -<br>0.12<br>ab | -<br>0.12<br>ab | -<br>0.07<br>ab | -<br>0.27<br>a  | -<br>0.50<br>a  | -<br>0.24<br>a  | -<br>0.16<br>ab | -<br>0.23<br>ab | NA | NA | NA | NA | NA | NA | 3.90E-14 |
| <i>LOC730101</i>    | -<br>0.06<br>ab | -<br>0.08<br>ab | -<br>0.06<br>ab | -<br>0.28<br>a  | -<br>0.23<br>ab | -<br>0.10<br>ab | -<br>0.47<br>b  | -<br>0.15<br>ab | NA | NA | NA | NA | NA | NA | 4.63E-14 |
| <i>ATPGD1</i>       | -<br>0.04<br>b  | -<br>0.09<br>ab | -<br>0.07<br>b  | -<br>0.32<br>ab | -<br>0.27<br>ab | -<br>0.36<br>a  | -<br>0.02<br>ab | -<br>0.09<br>ab | NA | NA | NA | NA | NA | NA | 1.63E-13 |
| <i>WASH5P</i>       | -<br>0.25<br>ab | -<br>0.21<br>a  | -<br>0.03<br>ab | -<br>0.23<br>a  | -<br>0.17<br>ab | -<br>0.04<br>ab | -<br>0.01<br>ab | -<br>0.04<br>ab | NA | NA | NA | NA | NA | NA | 3.19E-12 |
| <i>C20orf46</i>     | -<br>0.06<br>ab | -<br>0.17<br>a  | -<br>0.07<br>ab | -<br>0.29<br>a  | -<br>0.04<br>ab | -<br>0.19<br>a  | -<br>0.10<br>ab | -<br>0.21<br>a  | NA | NA | NA | NA | NA | NA | 7.38E-12 |
| <i>C19orf22</i>     | -<br>0.08<br>b  | -<br>0.01<br>b  | -<br>0.04<br>b  | -<br>0.30<br>ab | -<br>0.05<br>b  | -<br>0.38<br>a  | -<br>0.00<br>b  | -<br>0.07<br>b  | NA | NA | NA | NA | NA | NA | 2.20E-10 |
| <i>SUV420H1</i>     | -<br>0.13<br>b  | -<br>0.11<br>b  | -<br>0.04<br>ab | -<br>0.06<br>ab | -<br>0.39<br>b  | -<br>0.23<br>a  | -<br>0.01<br>ab | -<br>0.38<br>b  | NA | NA | NA | NA | NA | NA | 2.32E-10 |
| <i>LINC01512</i>    | -<br>0.02<br>ab | -<br>0.01<br>ab | -<br>0.04<br>a  | -<br>0.02<br>ab | -<br>0.02<br>ab | -<br>0.02<br>ab | -<br>0.53<br>b  | -<br>0.04<br>a  | NA | NA | NA | NA | NA | NA | 2.49E-10 |
| <i>LOC149837</i>    | -<br>0.22<br>b  | -<br>0.15<br>a  | -<br>0.02<br>ab | -<br>0.16<br>ab | -<br>0.14<br>ab | -<br>0.00<br>ab | -<br>0.14<br>ab | -<br>0.16<br>ab | NA | NA | NA | NA | NA | NA | 3.95E-08 |
| <i>SINHCAF</i>      | -<br>0.08<br>a  | -<br>0.09<br>a  | -<br>0.04<br>a  | -<br>0.40<br>a  | -<br>0.37<br>a  | -<br>0.11<br>a  | -<br>0.17<br>a  | -<br>0.05<br>a  | NA | NA | NA | NA | NA | NA | 6.33E-08 |
| <i>LOC100134868</i> | -<br>0.21<br>b  | -<br>0.17<br>a  | -<br>0.01<br>ab | -<br>0.13<br>ab | -<br>0.10<br>ab | -<br>0.10<br>ab | -<br>0.01<br>ab | -<br>0.02<br>ab | NA | NA | NA | NA | NA | NA | 2.18E-07 |
| <i>LOC642846</i>    | -<br>0.11<br>a  | -<br>0.05<br>a  | -<br>0.07<br>a  | -<br>0.25<br>a  | -<br>0.10<br>a  | -<br>0.18<br>a  | -<br>0.11<br>a  | -<br>0.11<br>a  | NA | NA | NA | NA | NA | NA | 1.25E-06 |
| <i>KIAA1026</i>     | -<br>0.10<br>a  | -<br>0.03<br>a  | -<br>0.03<br>a  | -<br>0.09<br>a  | -<br>0.03<br>a  | -<br>0.22<br>a  | -<br>0.29<br>a  | -<br>0.01<br>a  | NA | NA | NA | NA | NA | NA | 2.81E-06 |
| <i>LOC374443</i>    | -<br>0.09<br>b  | -<br>0.07<br>b  | -<br>0.00<br>b  | -<br>0.05<br>ab | -<br>0.28<br>b  | -<br>0.31<br>a  | -<br>0.00<br>b  | -<br>0.02<br>b  | NA | NA | NA | NA | NA | NA | 6.53E-06 |

\*CHR\_HSCHR11\_2\_CTG1

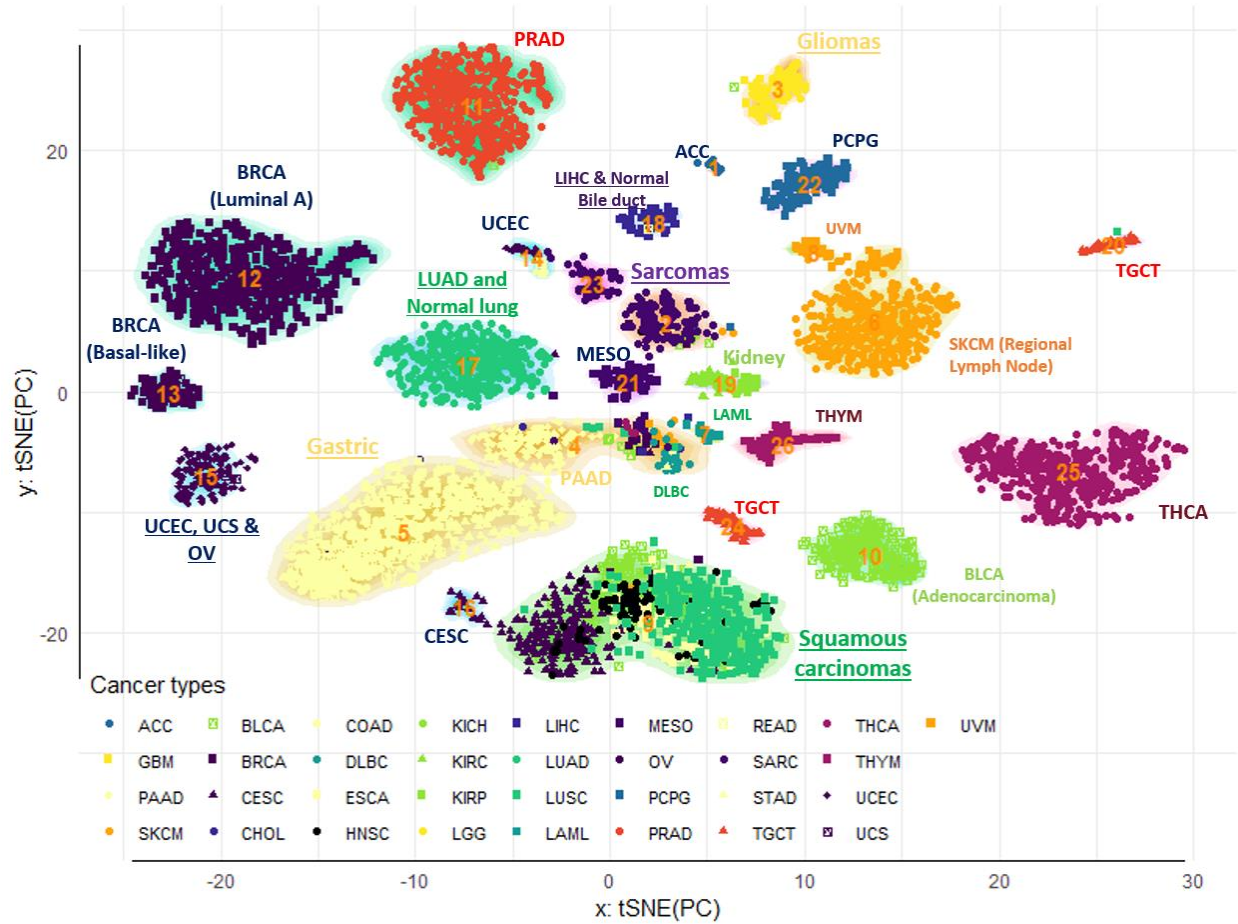

**Figure S1: Pan-cancer clustering of tumor samples (no tissue effects correction, no sparsity constrains on the features activities).** Tumor clusters were obtained by sequential application of tSNE and DBSCAN algorithm for 5,408 samples from 33 cancer types. The contours reflect cluster membership, and the points' colors and shapes represent similar anatomical site and cancer type, respectively. The two dimensional tSNE projection was obtained from the first 50 principal axes of the extended omic matrix, after removing the first two. Extended omic matrix contained appended values of gene expression, DNA methylation, and copy number variant intensity. Integers represent individual clusters. Clusters were also annotated in terms of their most enriched histological/molecular subtypes.

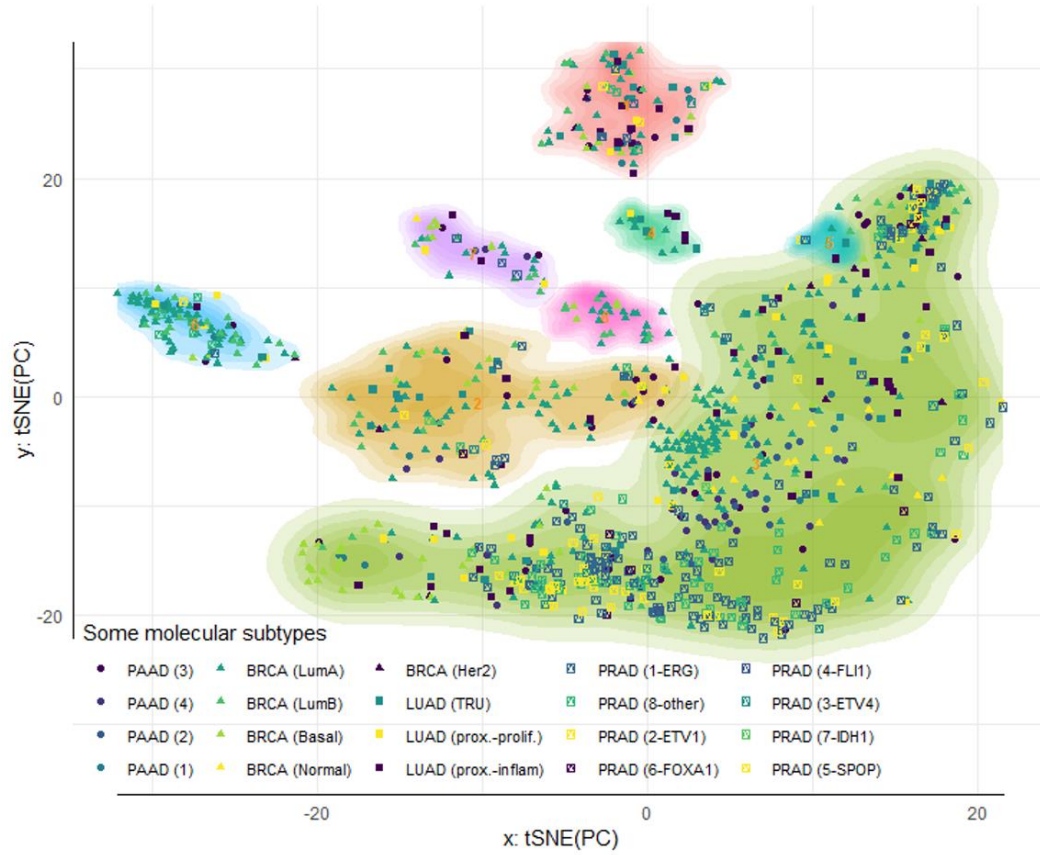

**Figure S2: Re-classification of tumors after removing tissue effects does not agree with previously reported molecular subtypes.**

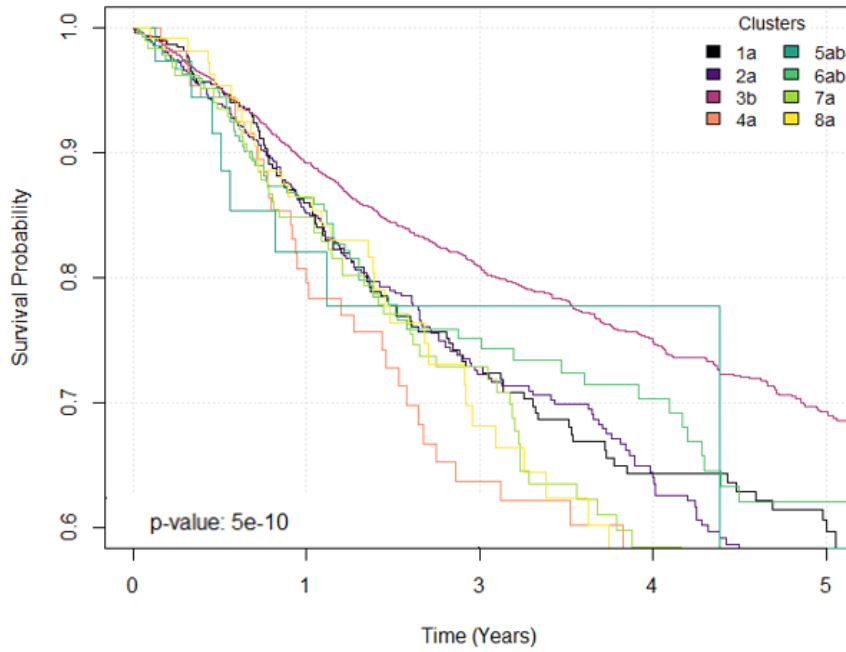

**Figure S3: Survival curves by pan-cancer tumor clusters.** The figure shows Kaplan-Meier curves highlighting the survival probability by time in years for each cluster. Log-rank tests were performed to determine significant differences between curves. The legend shows the results of multiple comparison between survival curves. Statistical differences are represented with different letters.

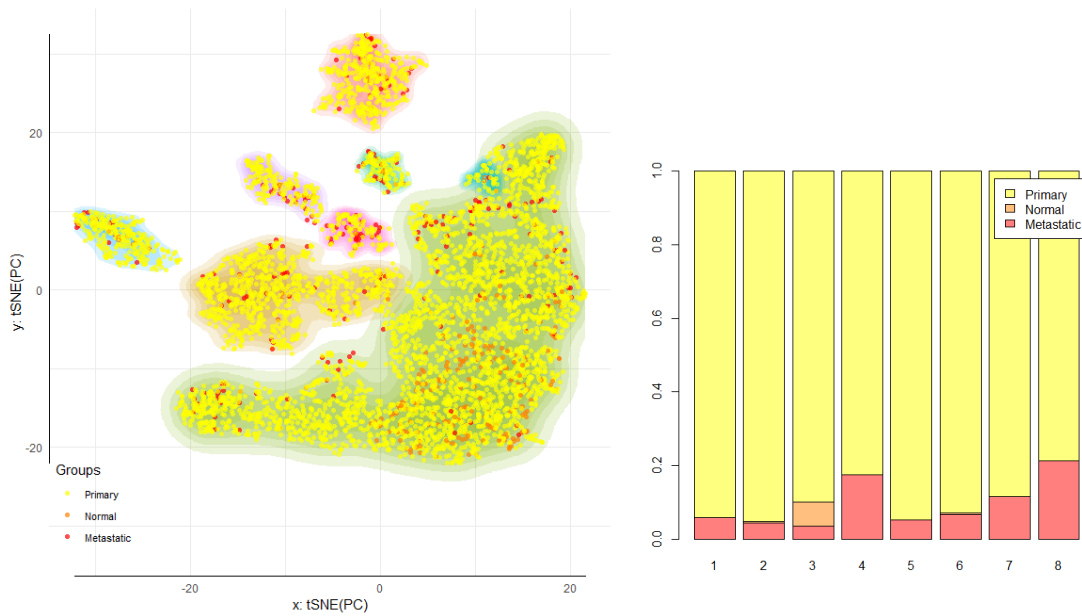

**Figure S4: Re-classification of pan-cancer tumors after removing tissue effects reveals differences in sample type composition.** The relative position and number of primary, normal, and metastatic tissue samples is shown. The figure at the left shows the samples location by clusters. The figure at the right shows the relative proportion of sample types by cluster.

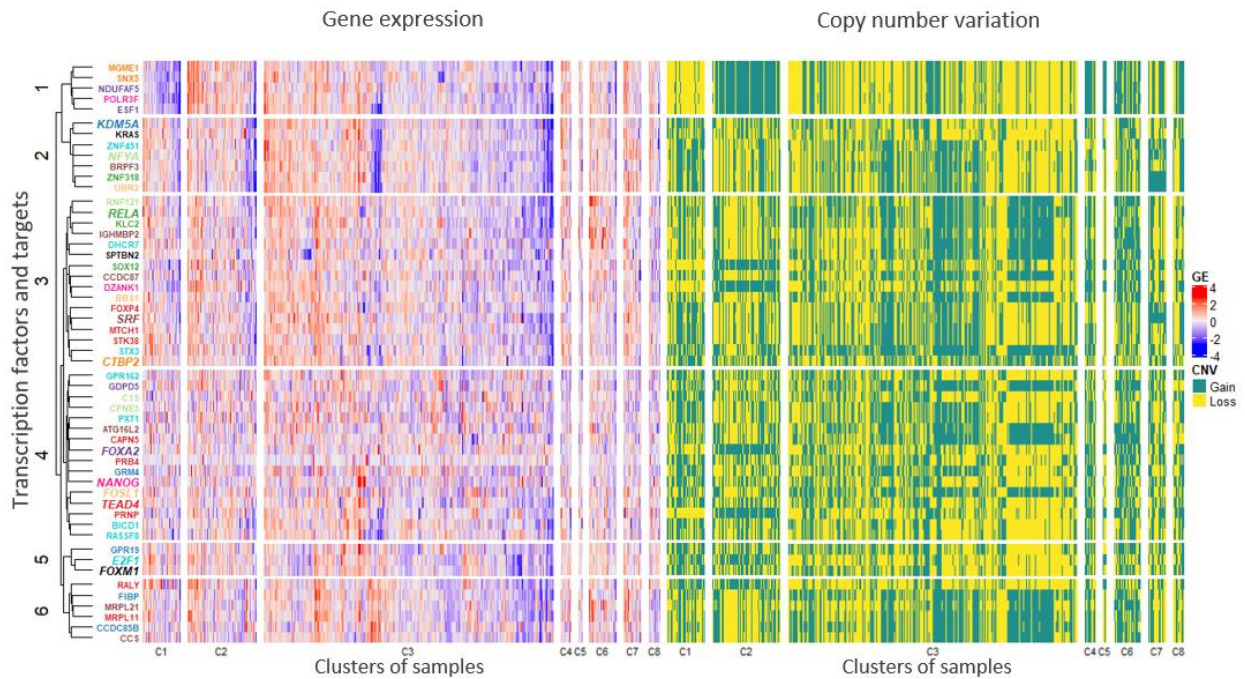

**Figure S5: Relationship between gene expression and copy number variation for transcription factors and their targets within the set of selected features.** The expression and copy number variation by gene is shown by cluster (C1-8). The colors by gene name represent groups defined by different transcription factors and their targets (e.g. black represents the group of *FOXM1* and its targets *KRAS* and *SPTBN2*). TFs names are shown with italic and larger font size. The number at the left of the dendrogram represent grouping of genes based on k-means clustering.
